# Supplementary material for: Synthesis, characterization, and alkoxide transfer reactivity of dimeric Tl2(OR)2 complexes
Source: Royal Society of Chemistry journal article supplement (doi:10.1039/d0dt03917a), 2021-01-01
Supplement: d0dt03917a1.pdf [file d0dt03917a1.pdf]

## Electronic Supplementary Information

For

### Synthesis, Characterization, and Alkoxide Transfer Reactivity of Dimeric $Tl_2(OR)_2$ Complexes

Amanda Grass,<sup>a†</sup> Lakshani Wathsala Kulathungage,<sup>a†</sup> Duleeka Wannipurage,<sup>a†</sup> Maryam Yousif,<sup>a,</sup>

<sup>c</sup> Cassandra L. Ward,<sup>b</sup> Stanislav Groysman<sup>\*a</sup>

<sup>a</sup>Department of Chemistry, Wayne State University, 5101 Cass Ave. Detroit MI 48202.

<sup>b</sup>Lumigen Instrument Center, Wayne State University, 5101 Cass Avenue, Detroit, Michigan 48202, United States.

<sup>c</sup>Current affiliation: Department of Chemistry, Grand Valley State University. 1 Campus Drive, 312 Padnos Hall, Allendale, Michigan 49401

E-mail: groysman@wayne.edu

<sup>†</sup>These authors contributed equally to this work.

## Table of Contents

|                                                                                                                           |    |
|---------------------------------------------------------------------------------------------------------------------------|----|
| 1. NMR spectra                                                                                                            | 3  |
| 2. UV-vis spectra                                                                                                         | 36 |
| 3. IR spectra                                                                                                             | 41 |
| 4. ORTEP plots of <b>1a</b> and <b>1b</b> demonstrating agostic interactions                                              | 44 |
| 5. X-ray structure of LiOC <sup>t</sup> Bu <sub>2</sub> (3,5-Me <sub>2</sub> C <sub>6</sub> H <sub>3</sub> ) ( <b>7</b> ) | 45 |
| 6. Crystal and structure refinement data                                                                                  | 46 |

## 1. NMR Spectra

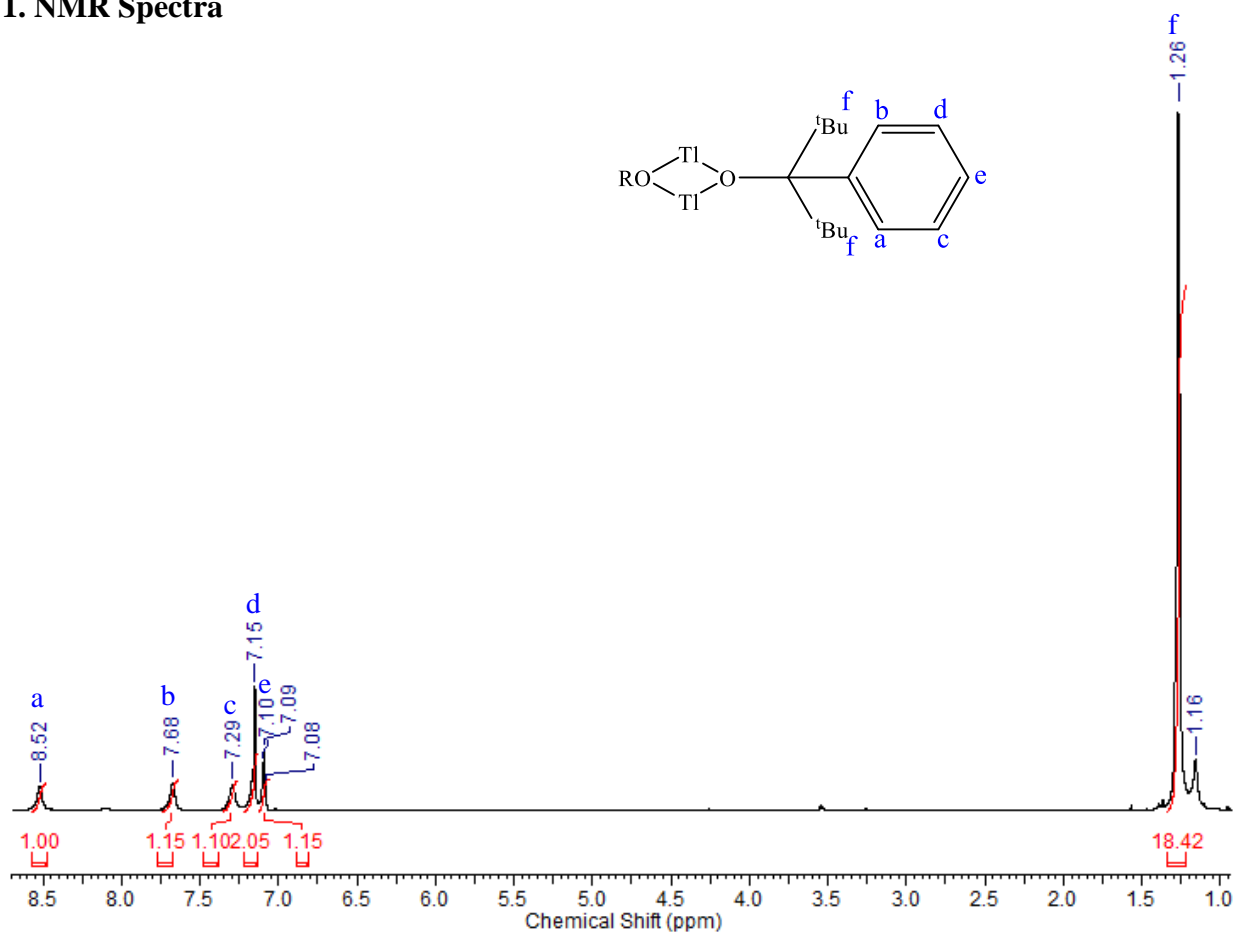

**Figure S1.**  $^1\text{H}$  NMR of  $\text{Tl}_2(\text{OC}^t\text{Bu}_2\text{Ph})_2$  ( $\text{C}_6\text{D}_6$ , 600 MHz, room temperature).

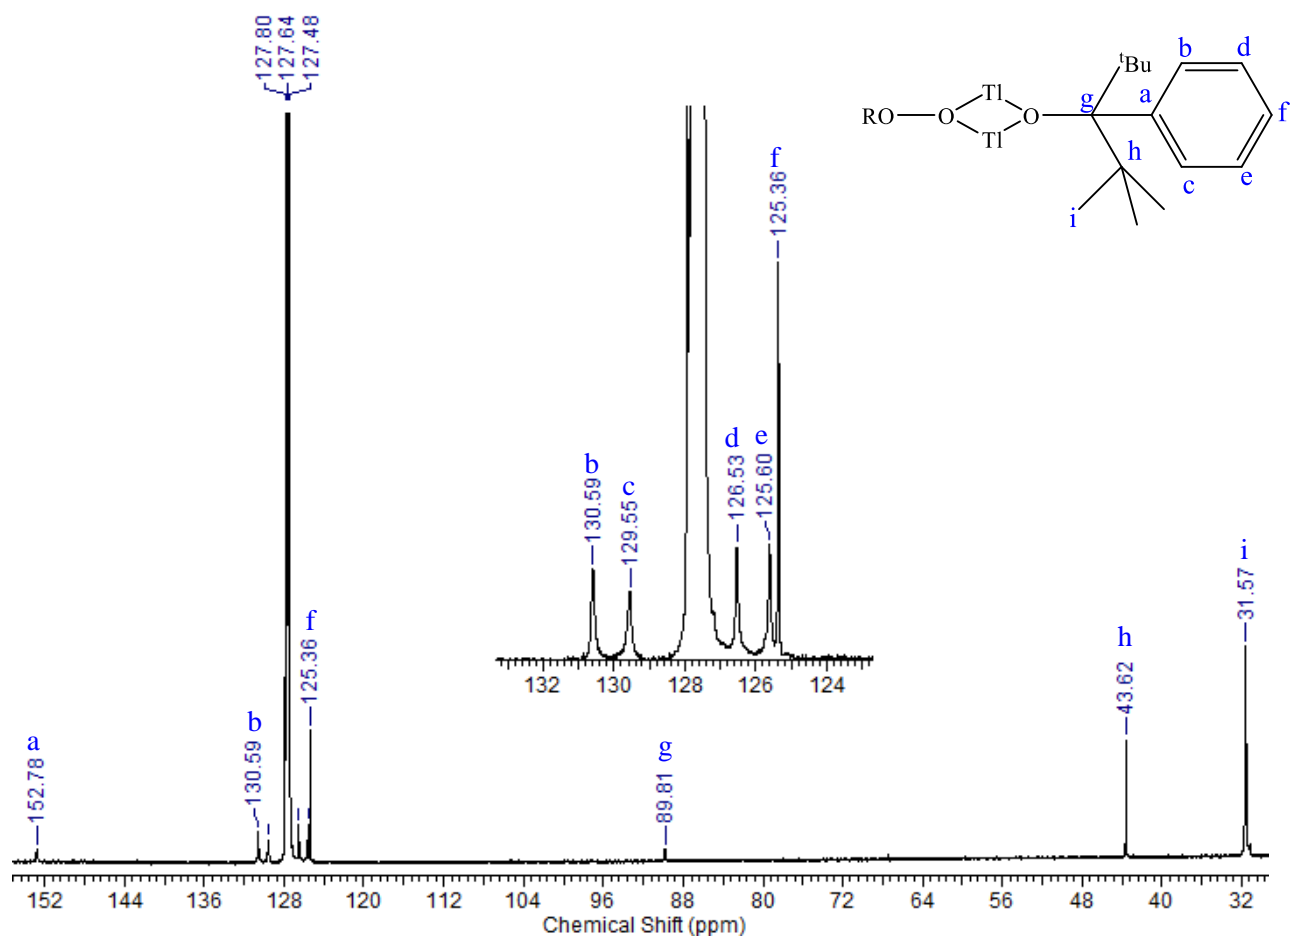

**Figure S2.**  $^{13}\text{C}$  NMR of  $\text{Ti}_2(\text{OC}^t\text{Bu}_2\text{Ph})_2$  ( $\text{C}_6\text{D}_6$ , 150 MHz).

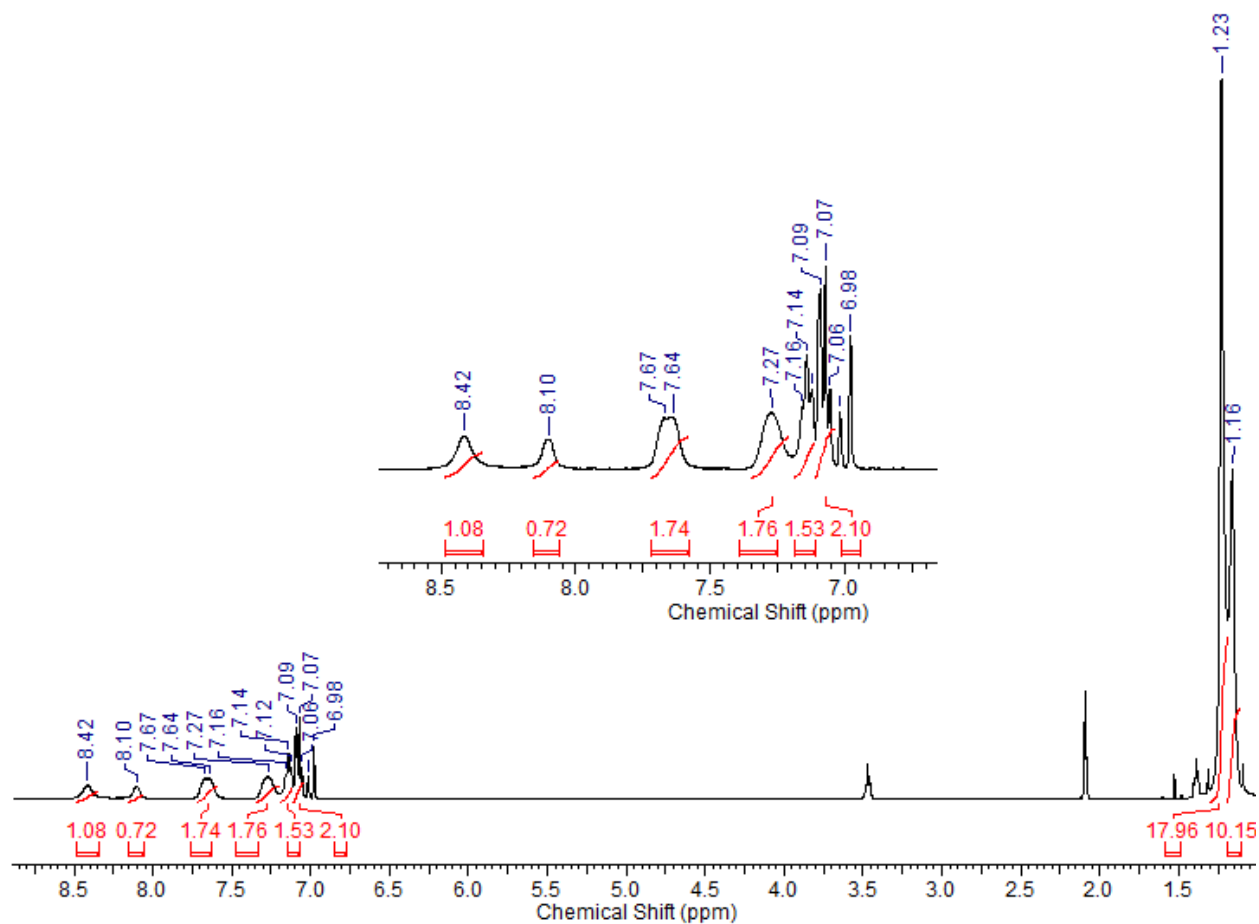

**Figure S3.** <sup>1</sup>H NMR of  $\text{Ti}_2(\text{OC}^t\text{Bu}_2\text{Ph})_2$  ( $\text{C}_7\text{D}_8$ , 400 MHz, room temperature).

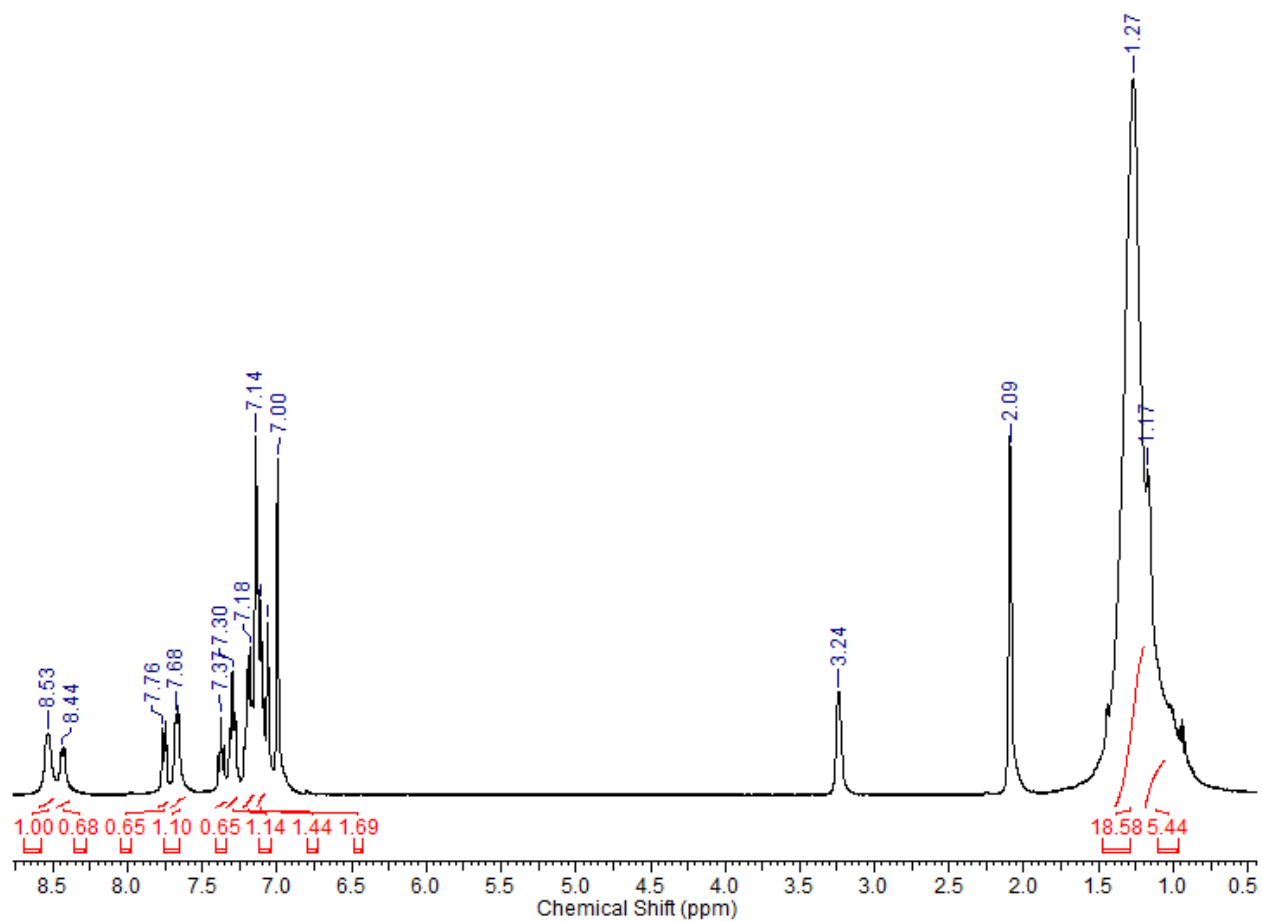

**Figure S4.**  $^1\text{H}$  NMR of  $\text{Tl}_2(\text{OC}^t\text{Bu}_2\text{Ph})_2$  ( $\text{C}_7\text{D}_8$ , 400 MHz,  $-40^\circ\text{C}$ ).

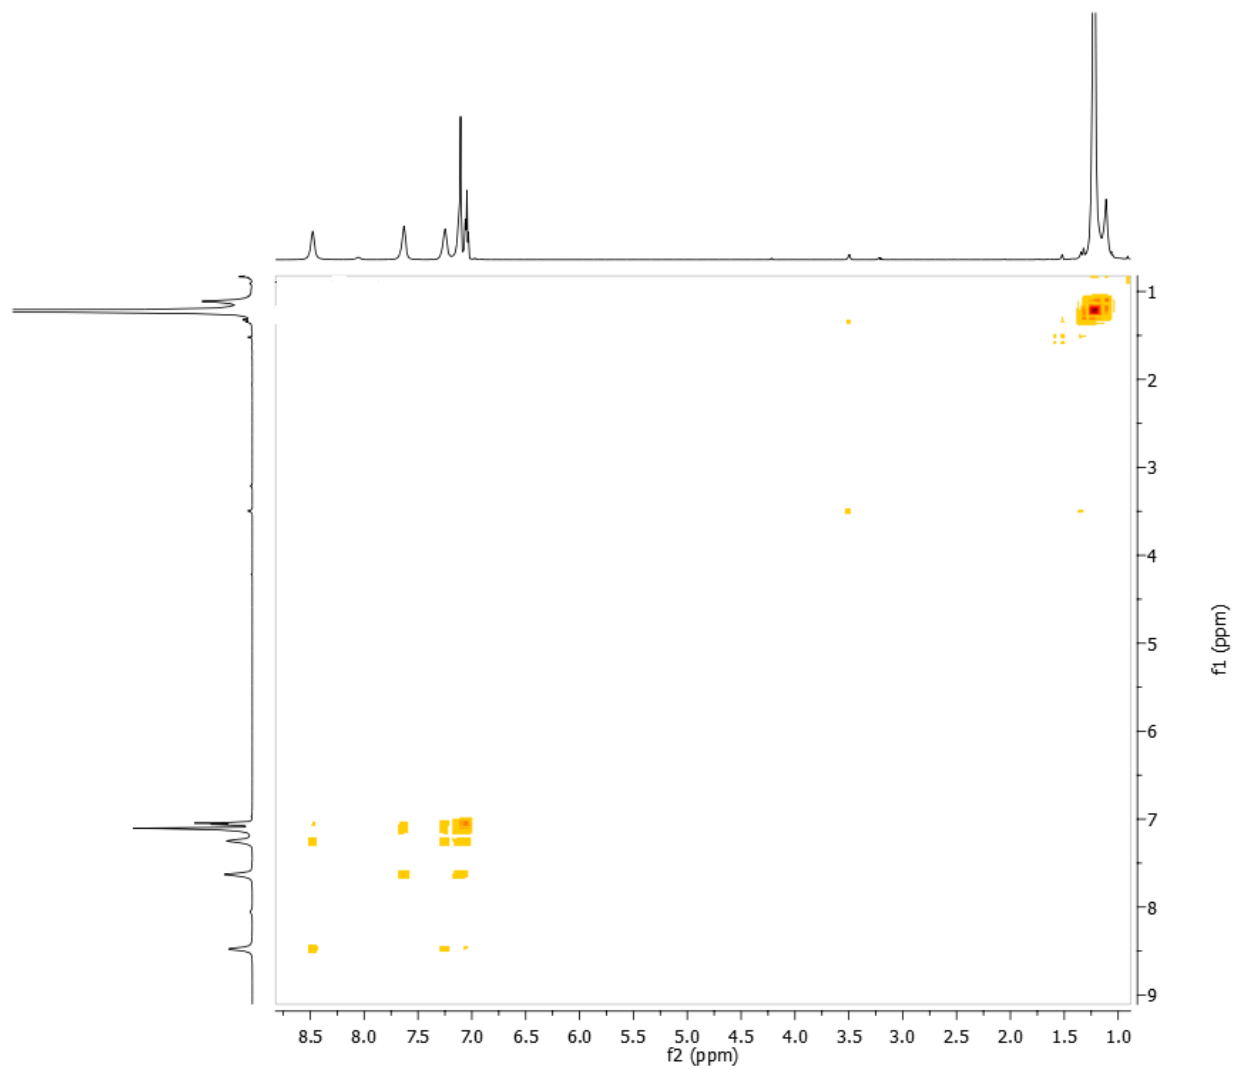

**Figure S5.** <sup>1</sup>H-<sup>1</sup>H COSY NMR of  $\text{Ti}_2(\text{OC}^t\text{Bu}_2\text{Ph})_2$  ( $\text{C}_6\text{D}_6$ , 600 MHz).

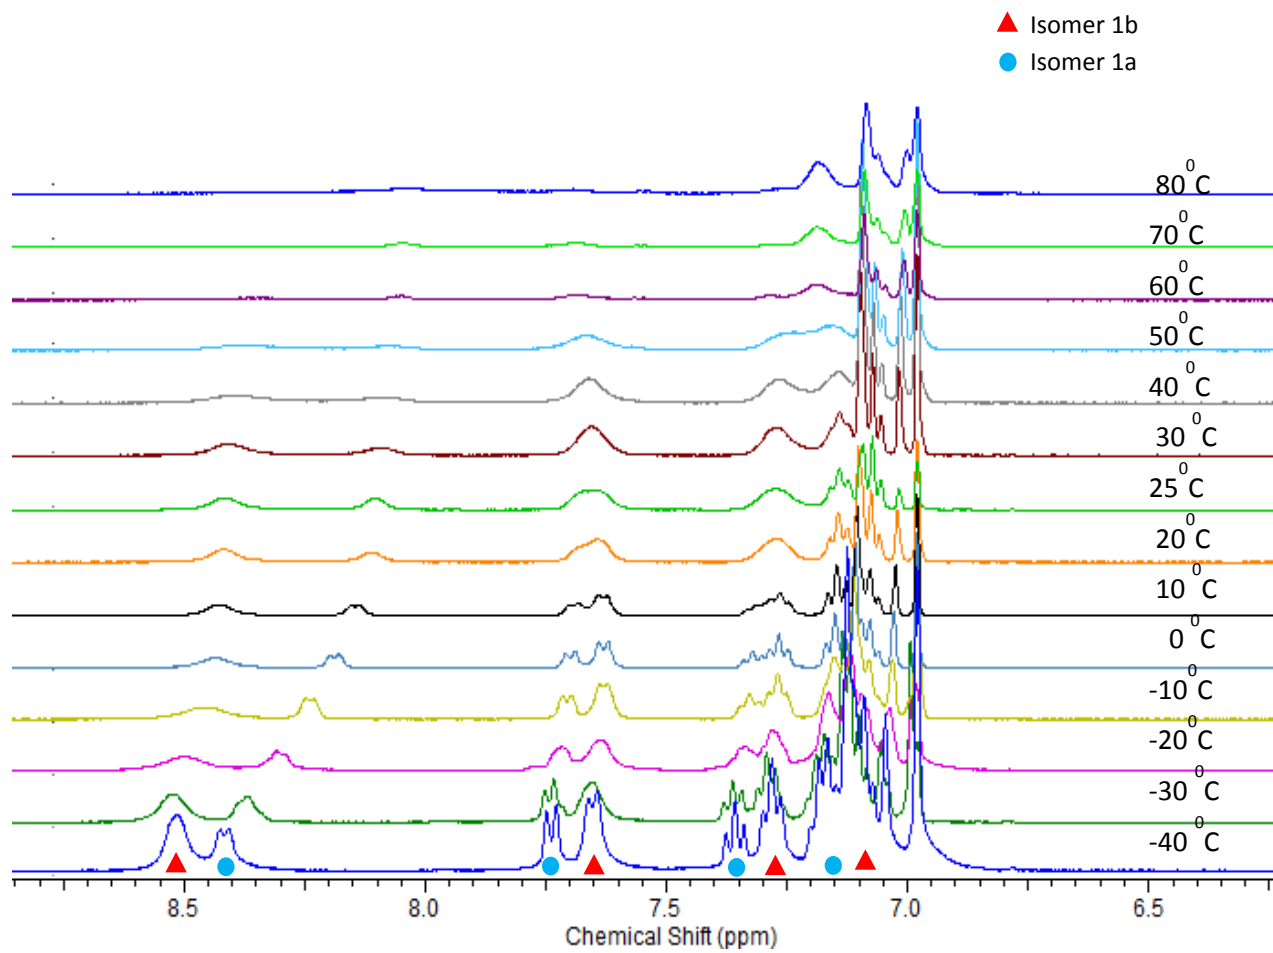

**Figure S6.** VT <sup>1</sup>H NMR of  $\text{Ti}_2(\text{OC}^t\text{Bu}_2\text{Ph})_2$  ( $\text{C}_7\text{D}_8$ , 400 MHz).



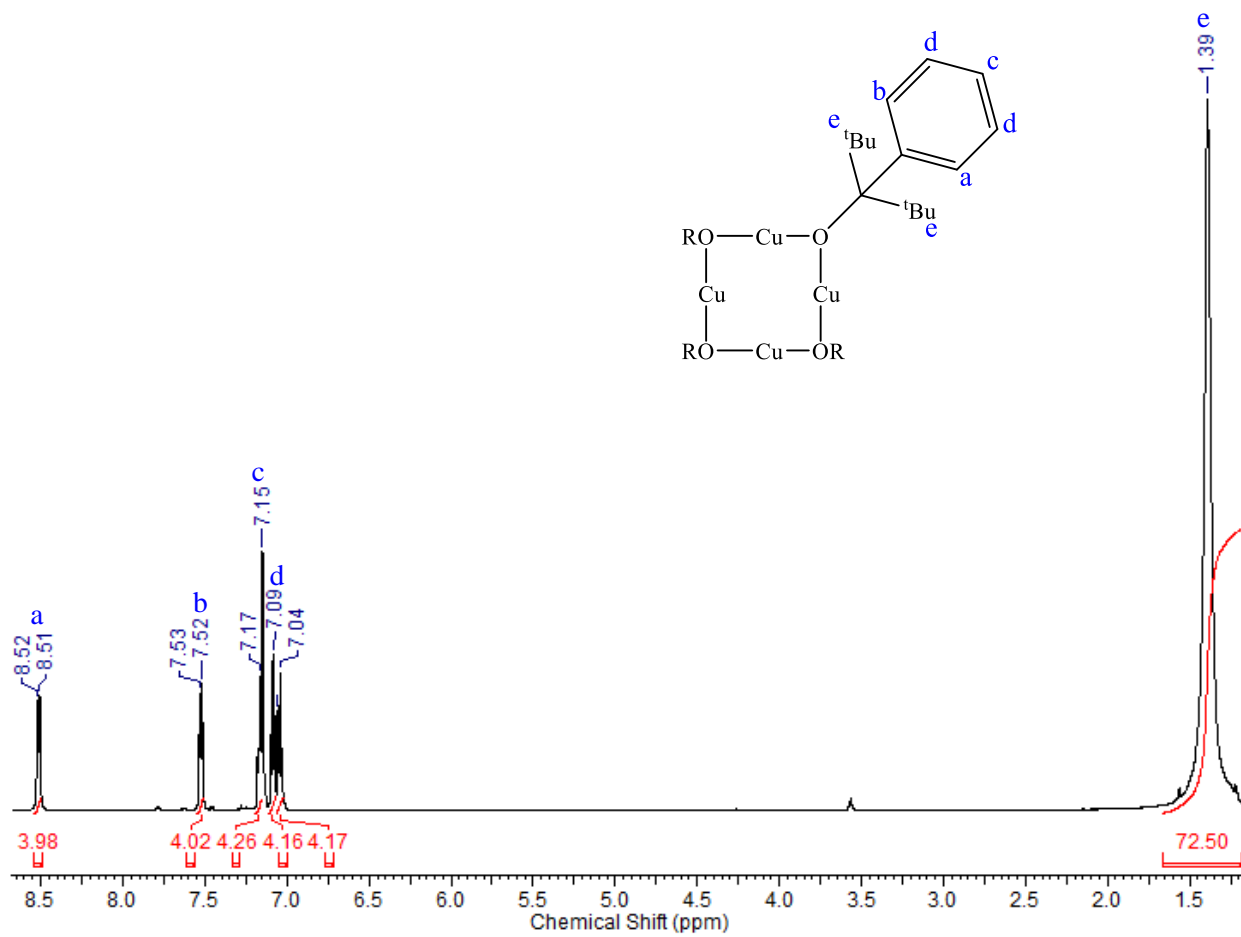

**Figure S7.**  $^1\text{H}$  NMR of  $\text{Cu}_4(\text{OC}^t\text{Bu}_2\text{Ph})_4$  ( $\text{C}_6\text{D}_6$ , 600 MHz).

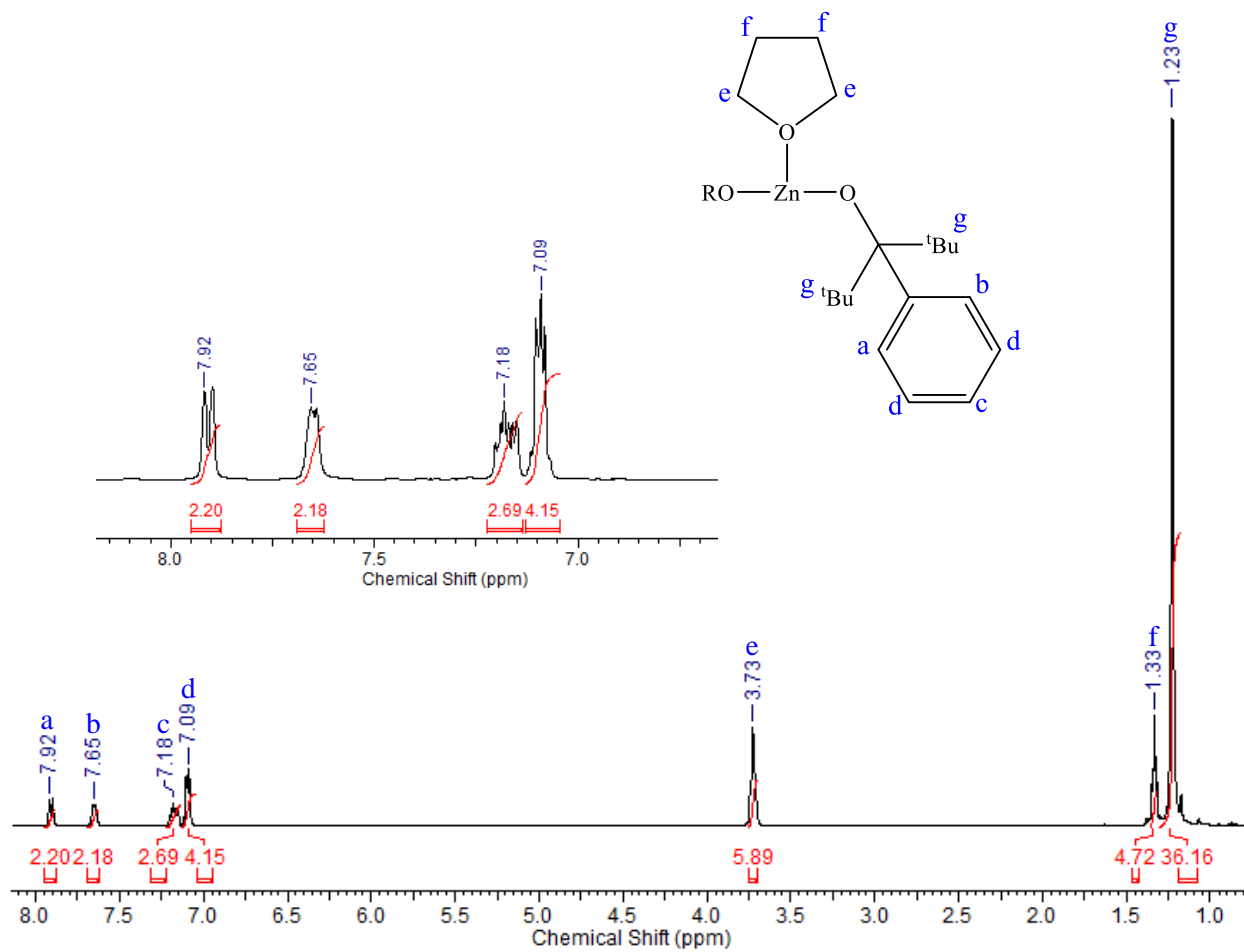

**Figure S8.**  $^1\text{H}$  NMR of  $\text{Zn}(\text{OC}^t\text{Bu}_2\text{Ph})_2(\text{THF})$  ( $\text{C}_6\text{D}_6$ , 400 MHz).

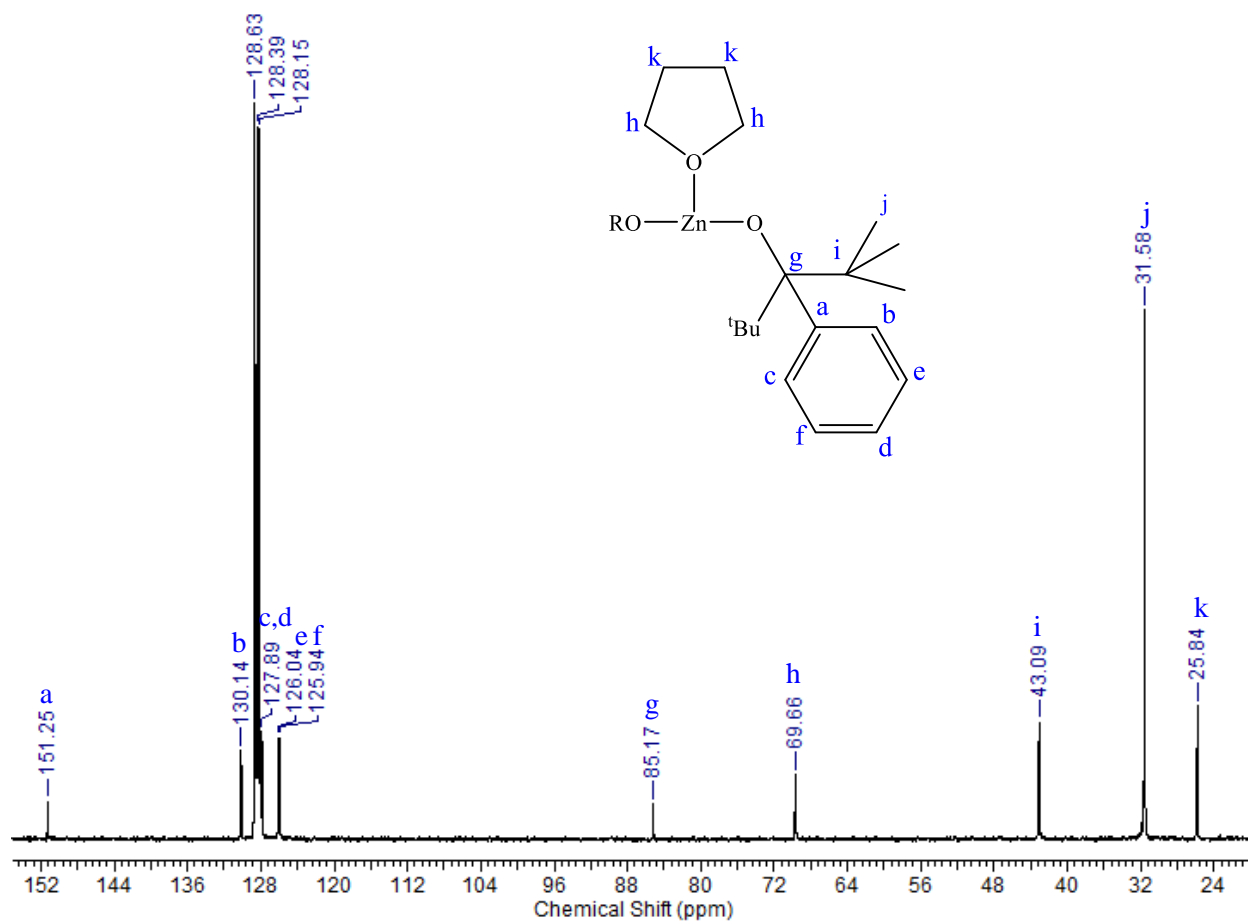

**Figure S9.**  $^{13}\text{C}$  NMR of  $\text{Zn}(\text{OR})_2(\text{THF})$  ( $\text{C}_6\text{D}_6$ , 100 MHz).

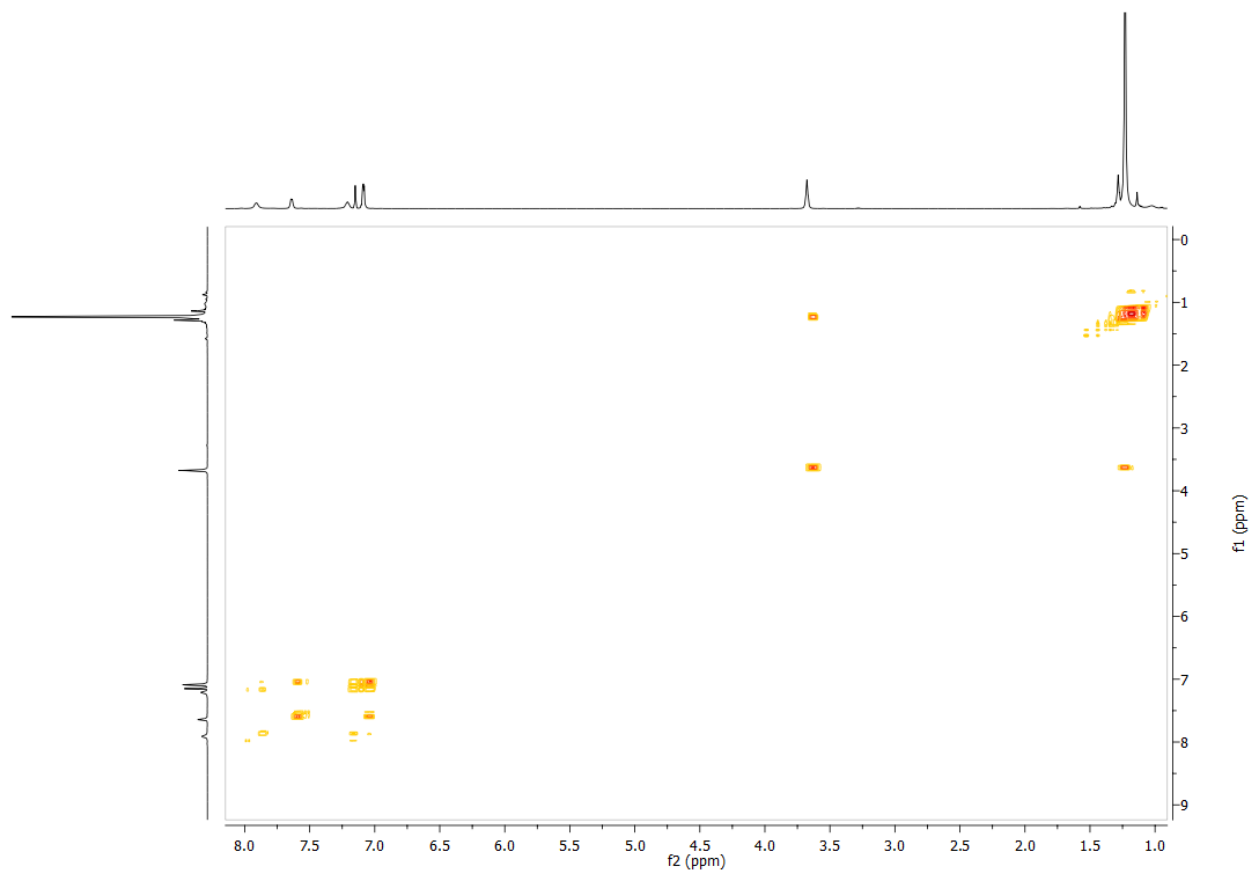

**Figure S10.**  $^1\text{H}$ - $^1\text{H}$  COSY NMR of  $\text{Zn}(\text{OR})_2(\text{THF})$  ( $\text{C}_6\text{D}_6$ , 600 MHz).

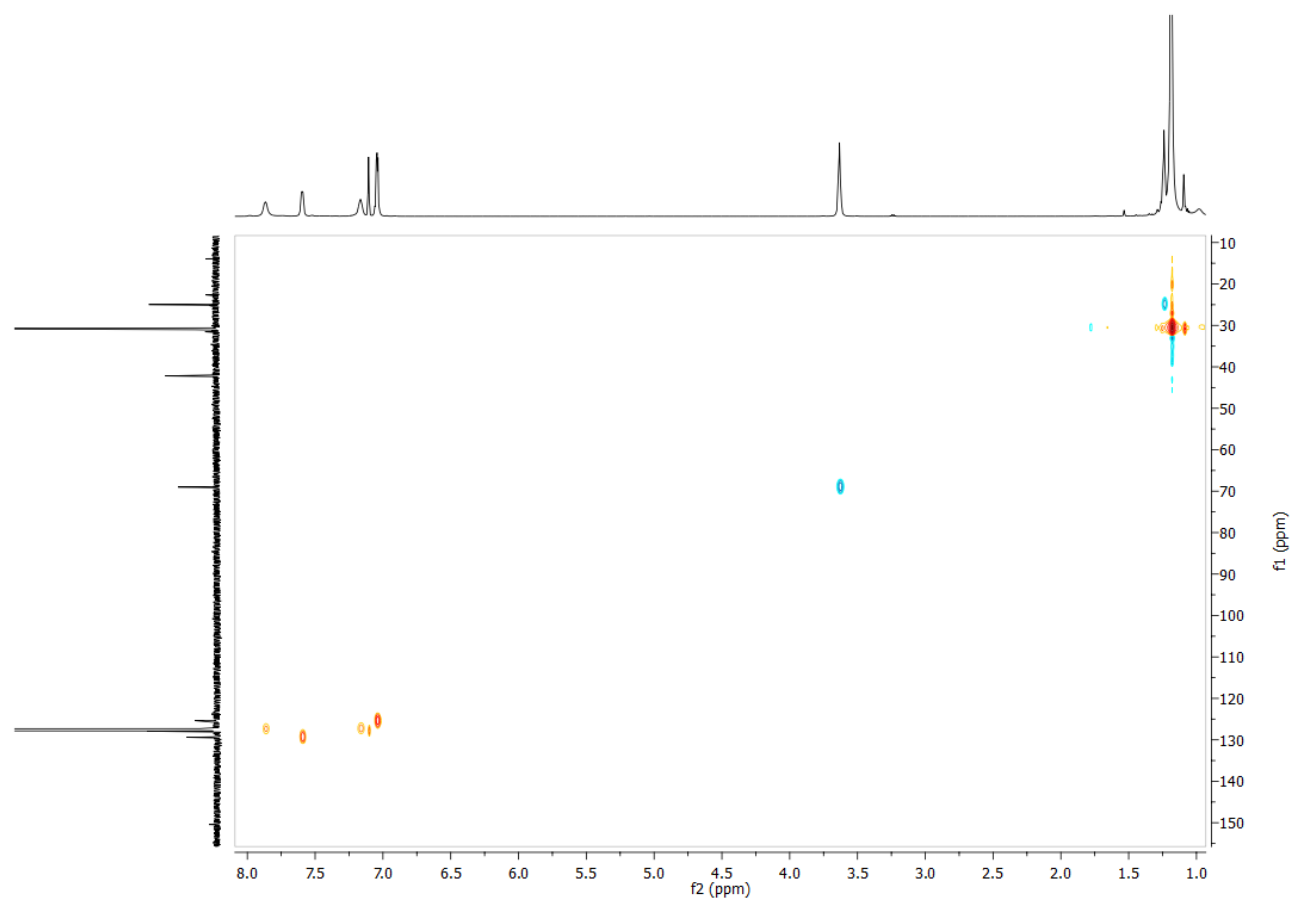

**Figure S11.**  $^1\text{H}$ - $^{13}\text{C}$  HSQCAD NMR of  $\text{Zn}(\text{OR})_2(\text{THF})$  ( $\text{C}_6\text{D}_6$ , 600 MHz).

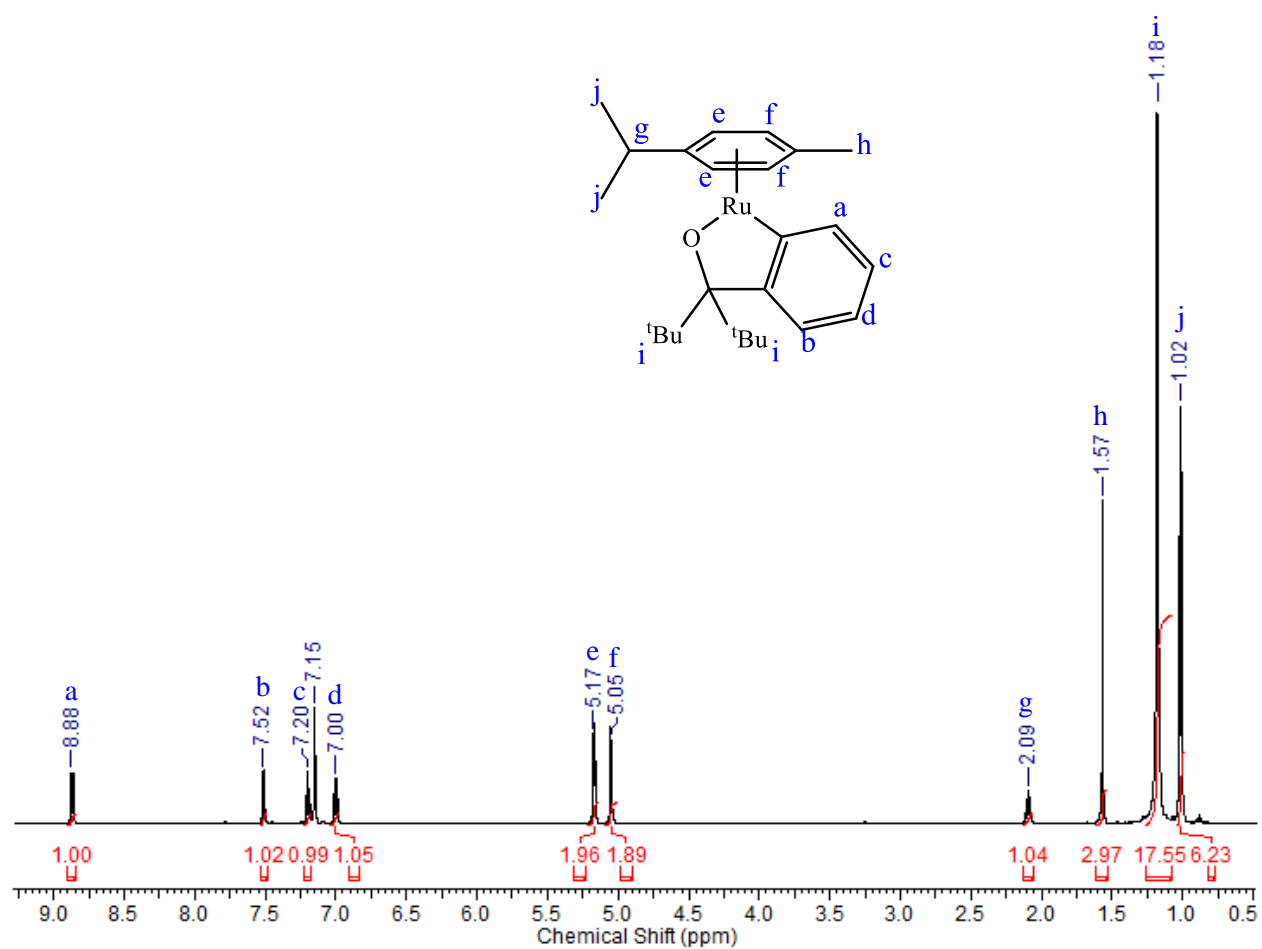

**Figure S12.**  $^1\text{H}$  NMR of  $\text{Ru}(\text{cymene})(\kappa^2\text{-OC}^t\text{Bu}_2\text{C}_6\text{H}_2)$  ( $\text{C}_6\text{D}_6$ , 600 MHz).

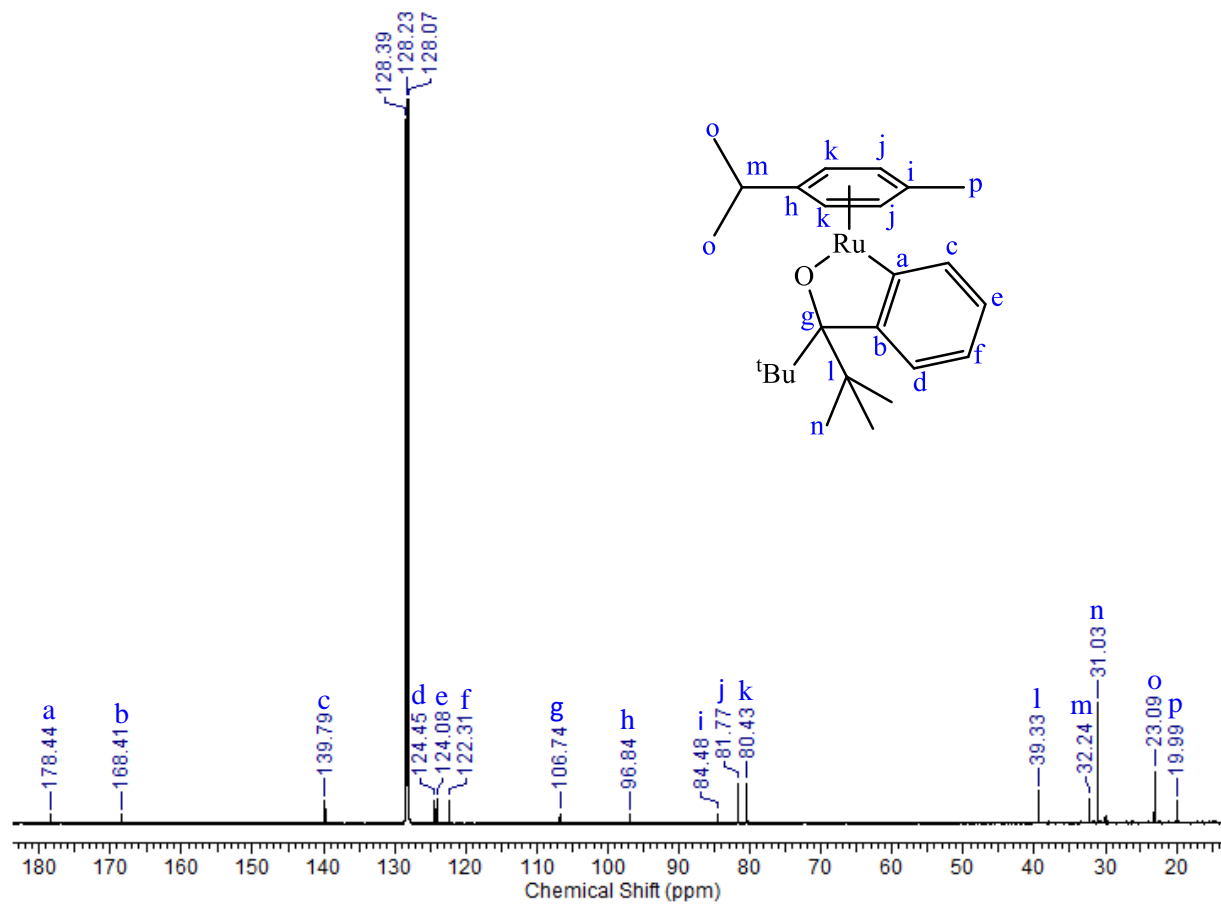

**Figure S13.**  $^{13}\text{C}$  NMR of  $\text{Ru}(\text{cymene})(\kappa^2\text{-OC}^t\text{Bu}_2\text{C}_6\text{H}_2)$  ( $\text{C}_6\text{D}_6$ , 150 MHz).

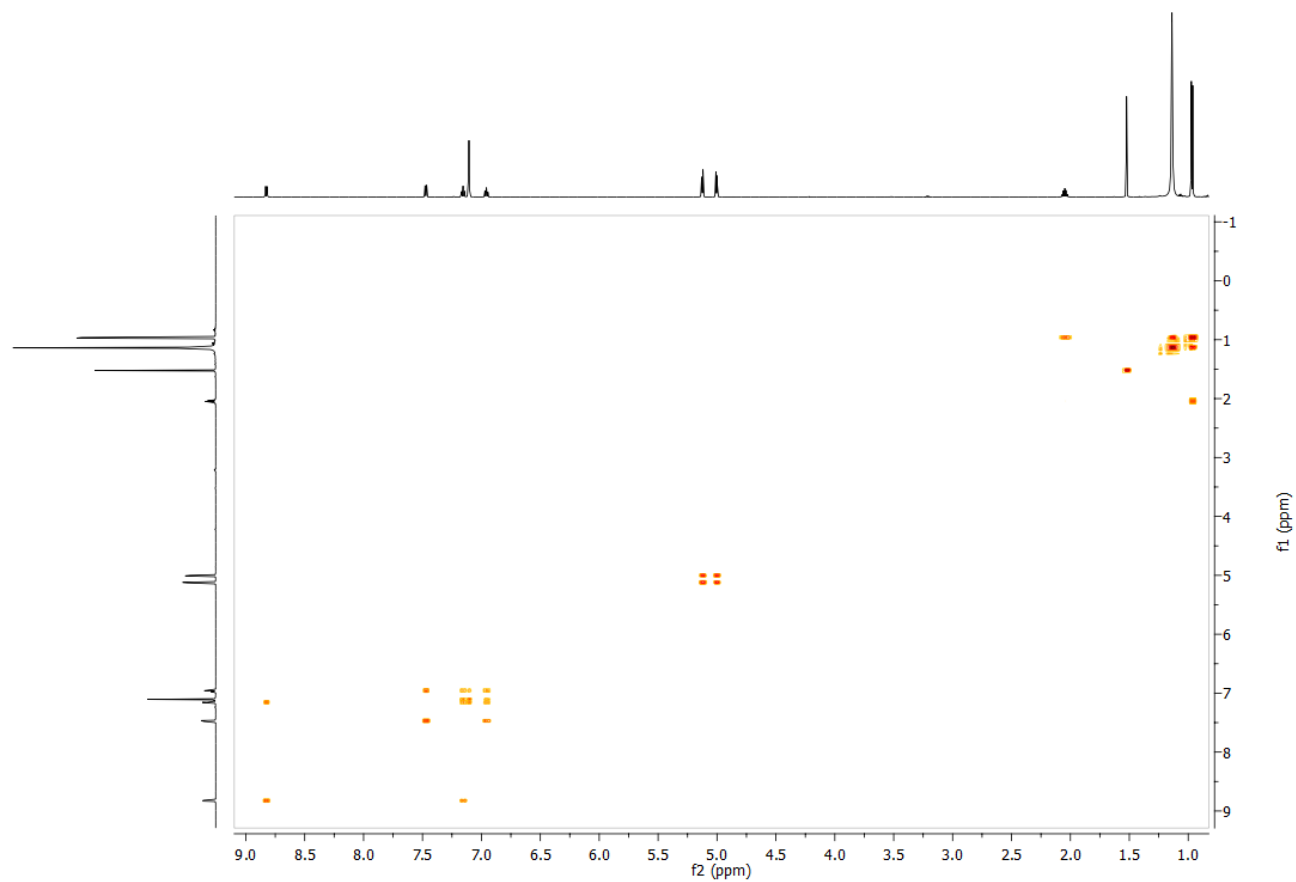

**Figure S14.**  $^1\text{H}$ - $^1\text{H}$  COSY NMR of  $\text{Ru}(\text{cymene})(\kappa^2\text{-OC}^t\text{Bu}_2\text{C}_6\text{H}_2)$  ( $\text{C}_6\text{D}_6$ , 600 MHz).



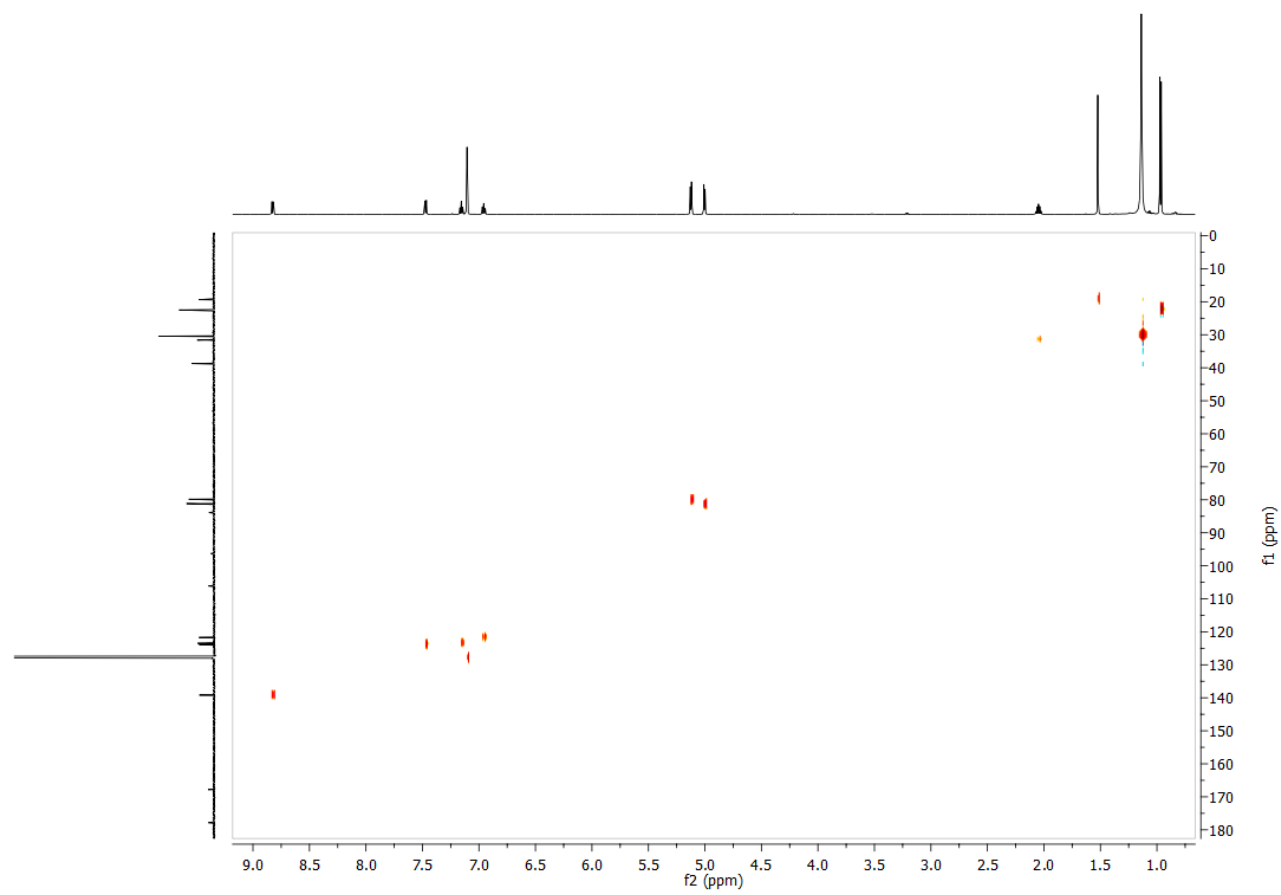

**Figure S15.**  $^1\text{H}$ - $^{13}\text{C}$  HSQCAD NMR of  $\text{Ru}(\text{cymene})(\kappa^2\text{-OC}^t\text{Bu}_2\text{C}_6\text{H}_2)$  ( $\text{C}_6\text{D}_6$ , 600 MHz).

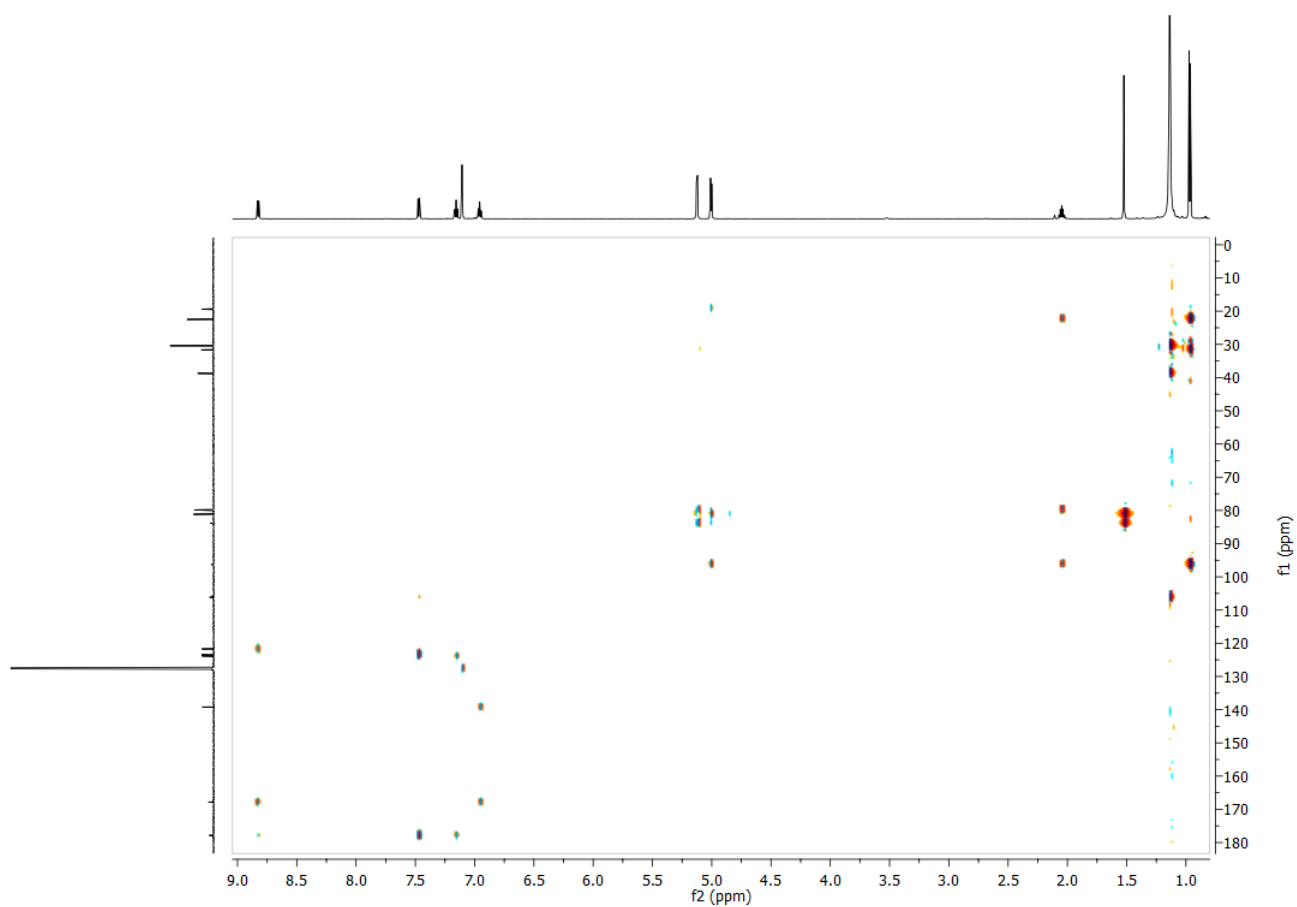

**Figure S16.**  $^1\text{H}$ - $^{13}\text{C}$  HMBC NMR of  $\text{Ru}(\text{cymene})(\kappa^2\text{-OC}^t\text{Bu}_2\text{C}_6\text{H}_2)$  ( $\text{C}_6\text{D}_6$ , 600 MHz).

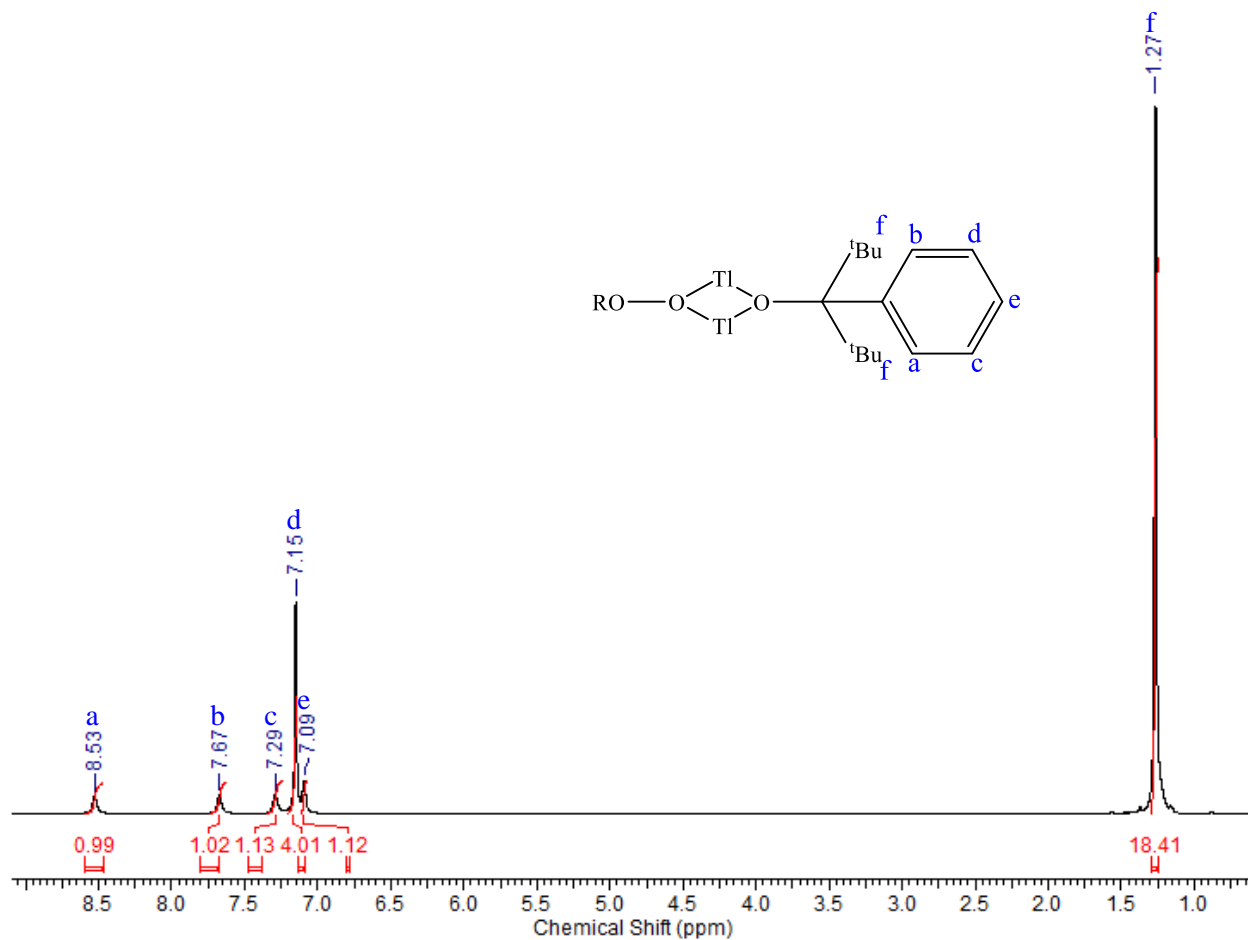

**Figure S17.**  $^1\text{H}$  NMR of  $\text{Tl}_2(\text{OC}^t\text{Bu}_2\text{Ph})_2$  as obtained from the attempted preparation of “Ni(OR) $_2$ ” ( $\text{C}_6\text{D}_6$ , 600 MHz).

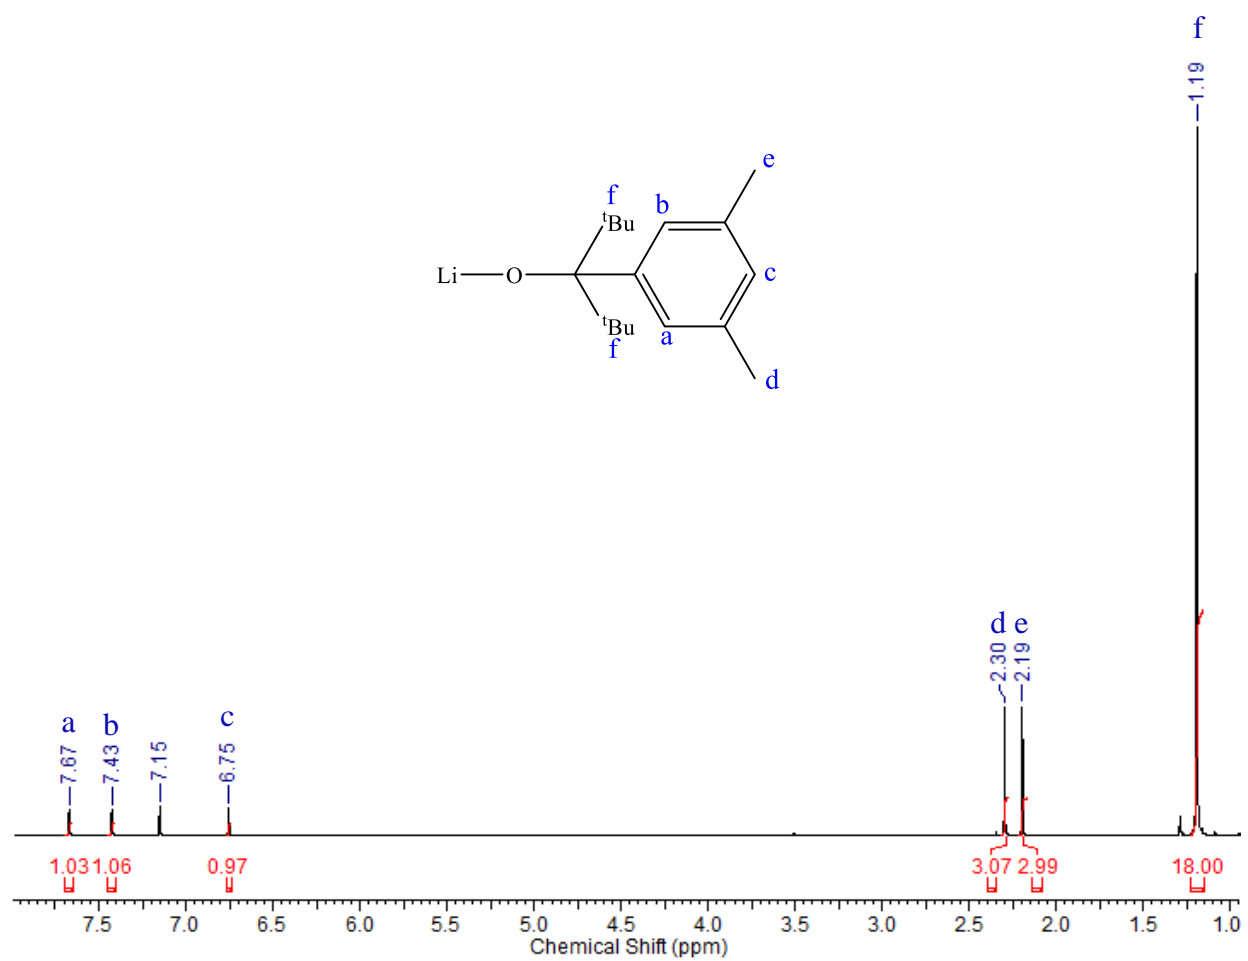

**Figure S18.** <sup>1</sup>H NMR of LiOC<sup>t</sup>Bu<sub>2</sub>(3,5-Me<sub>2</sub>C<sub>6</sub>H<sub>3</sub>) (C<sub>6</sub>D<sub>6</sub>, 600 MHz).

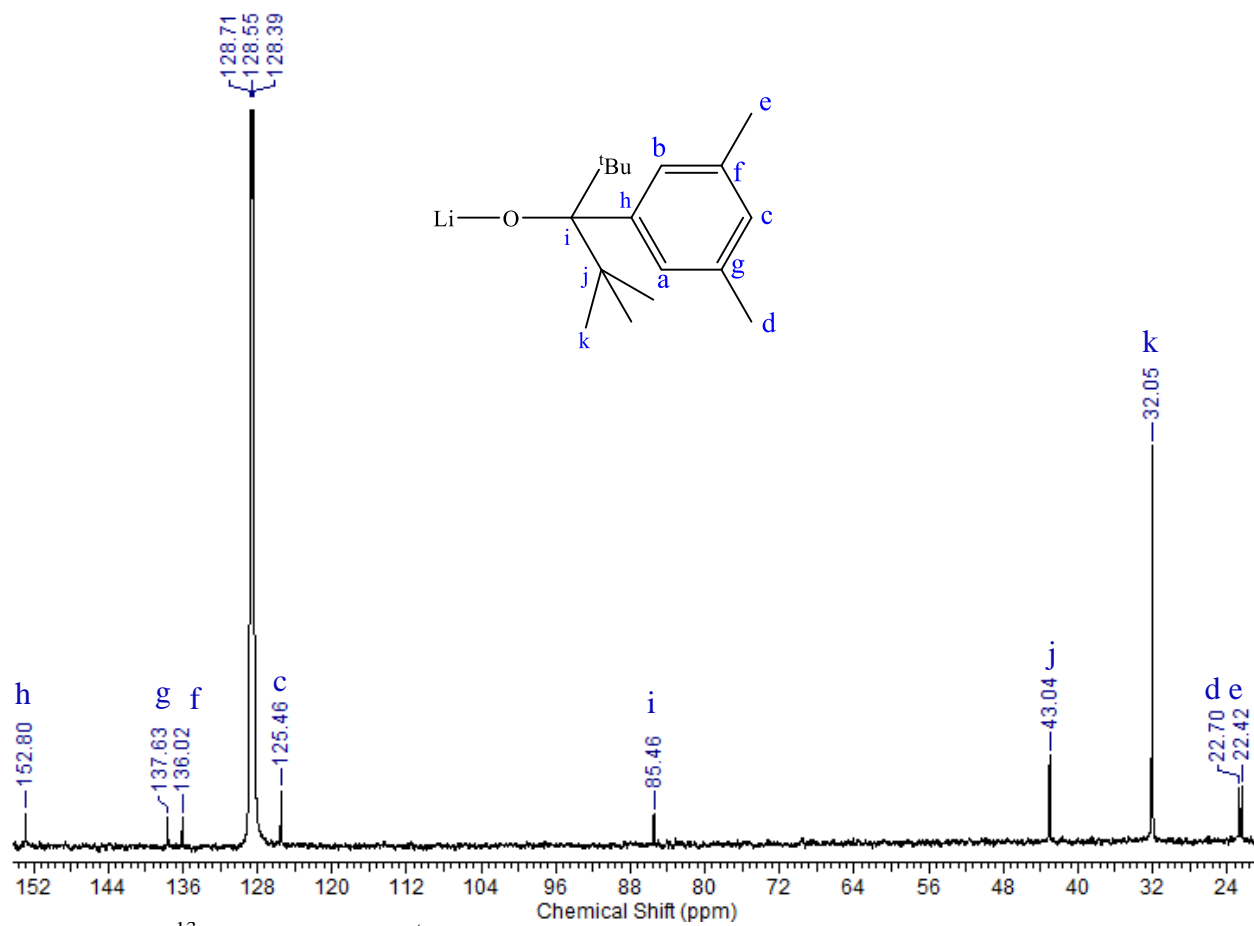

**Figure S19.**  $^{13}\text{C}$  NMR of  $\text{LiOC}^t\text{Bu}_2(3,5\text{-Me}_2\text{C}_6\text{H}_3)$  ( $\text{C}_6\text{D}_6$ , 150 MHz). \*Carbons **a** and **b** appear under  $\text{C}_6\text{D}_6$  peaks, and were detected by HSQCAD, HMBC and HMQC.

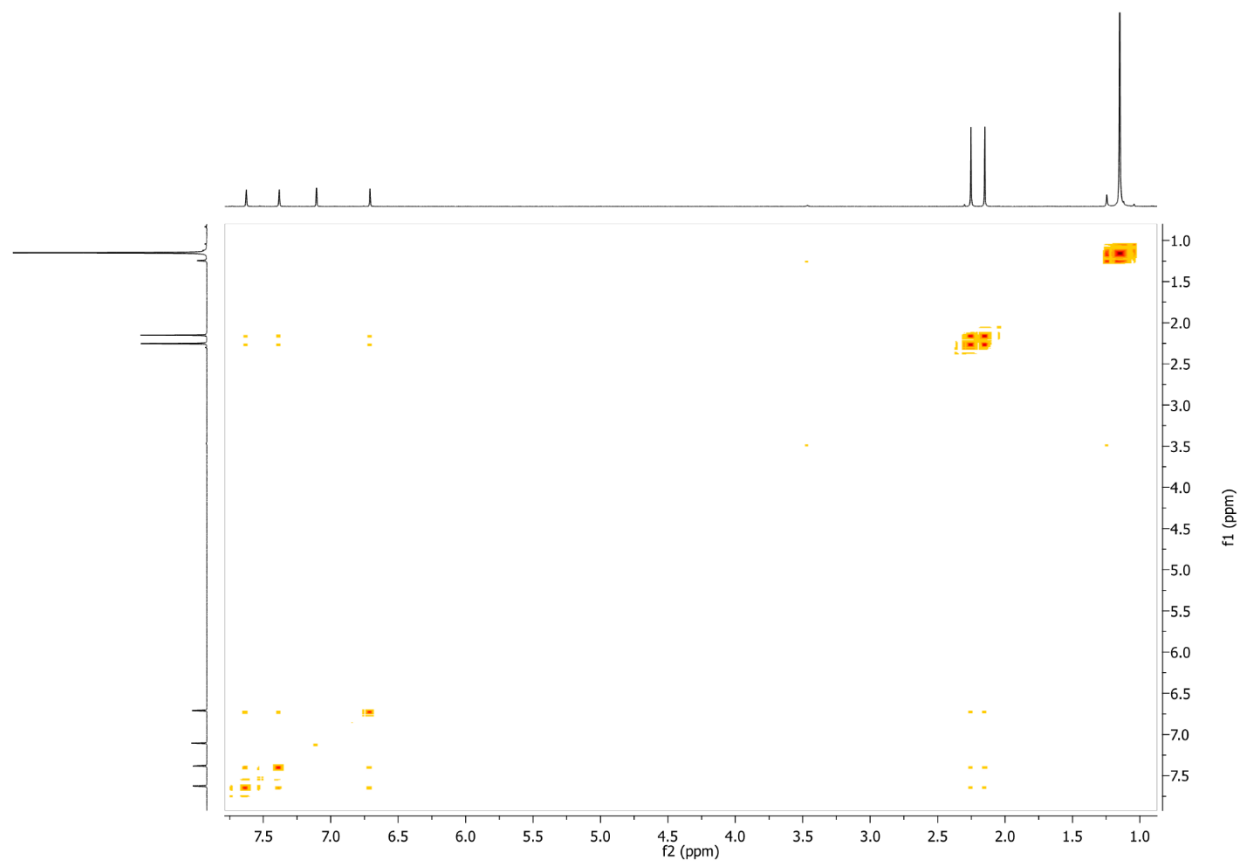

**Figure S20.** <sup>1</sup>H-<sup>1</sup>H COSY NMR of LiOC<sup>t</sup>Bu<sub>2</sub>(3,5-Me<sub>2</sub>C<sub>6</sub>H<sub>3</sub>) (C<sub>6</sub>D<sub>6</sub>, 600 MHz).

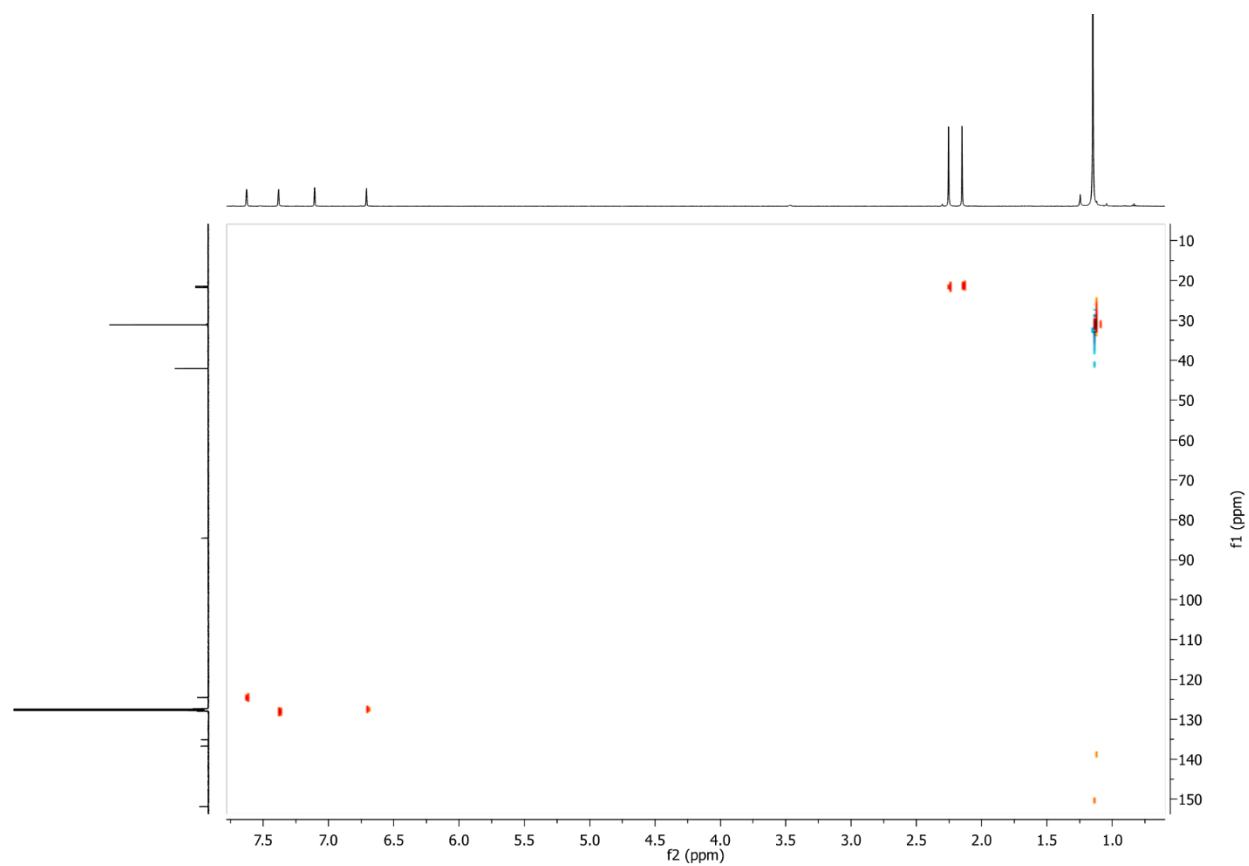

**Figure S21.**  $^1\text{H}$ - $^{13}\text{C}$  HSQC NMR of  $\text{LiOC}^t\text{Bu}_2(3,5\text{-Me}_2\text{C}_6\text{H}_3)$  ( $\text{C}_6\text{D}_6$ , 600 MHz).

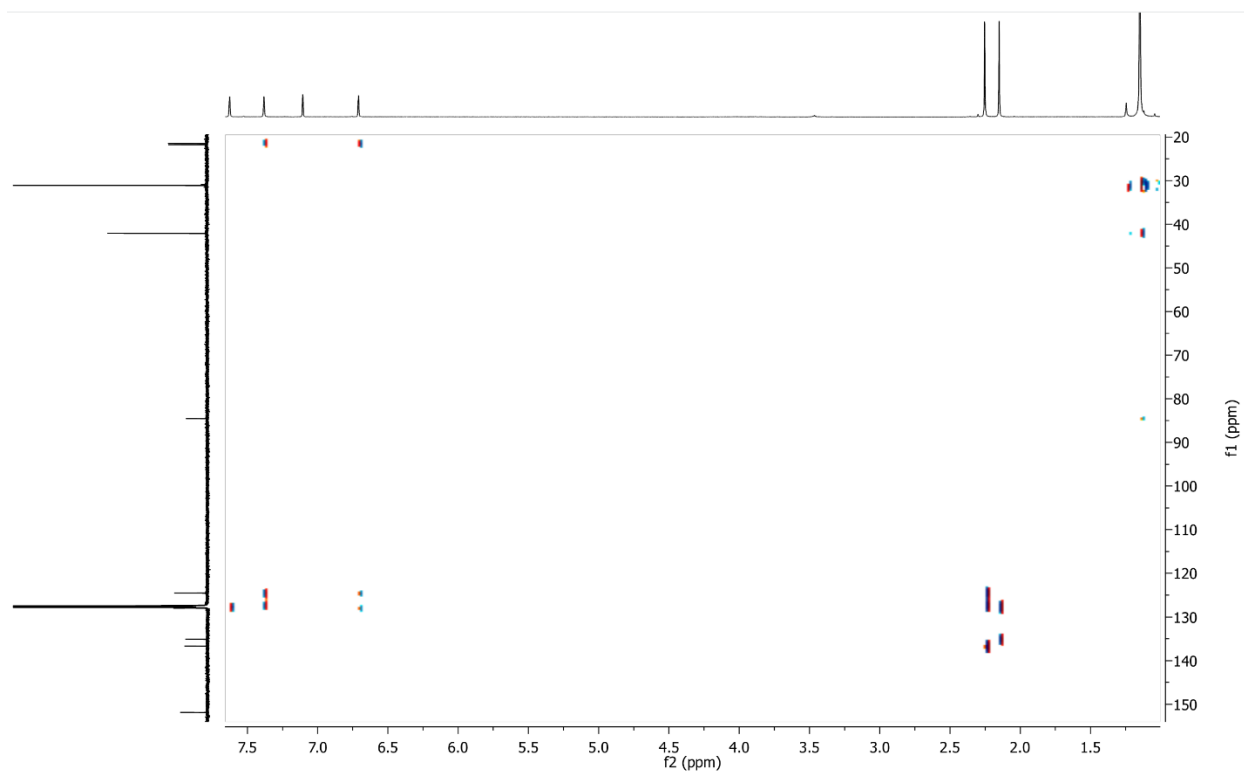

**Figure S22.**  $^1\text{H}$ - $^{13}\text{C}$  HMBCAD NMR of  $\text{LiOC}'\text{Bu}_2(3,5\text{-Me}_2\text{C}_6\text{H}_3)$  ( $\text{C}_6\text{D}_6$ , 600 MHz).



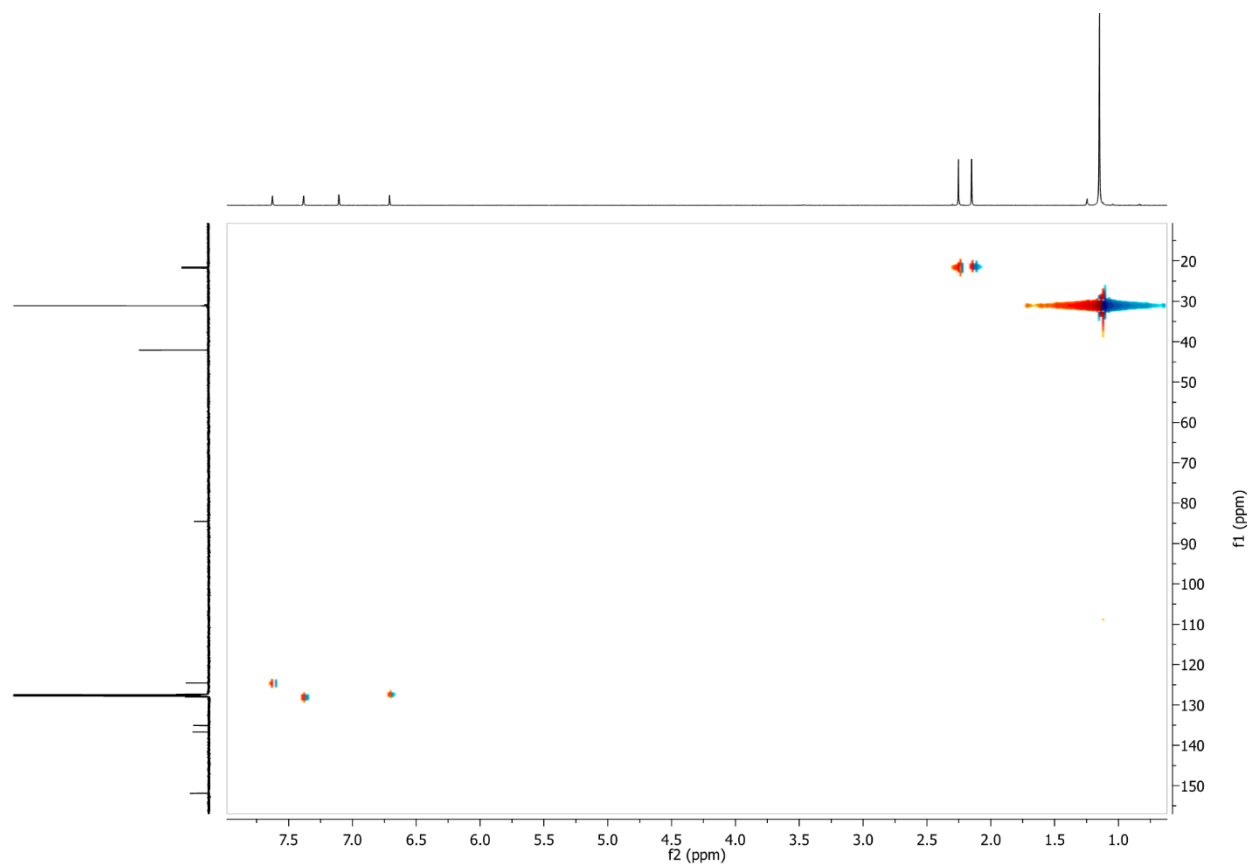

**Figure S23.**  $^1\text{H}$ - $^{13}\text{C}$  HMQC NMR of  $\text{LiOC}^t\text{Bu}_2(3,5\text{-Me}_2\text{C}_6\text{H}_3)$  ( $\text{C}_6\text{D}_6$ , 600 MHz).

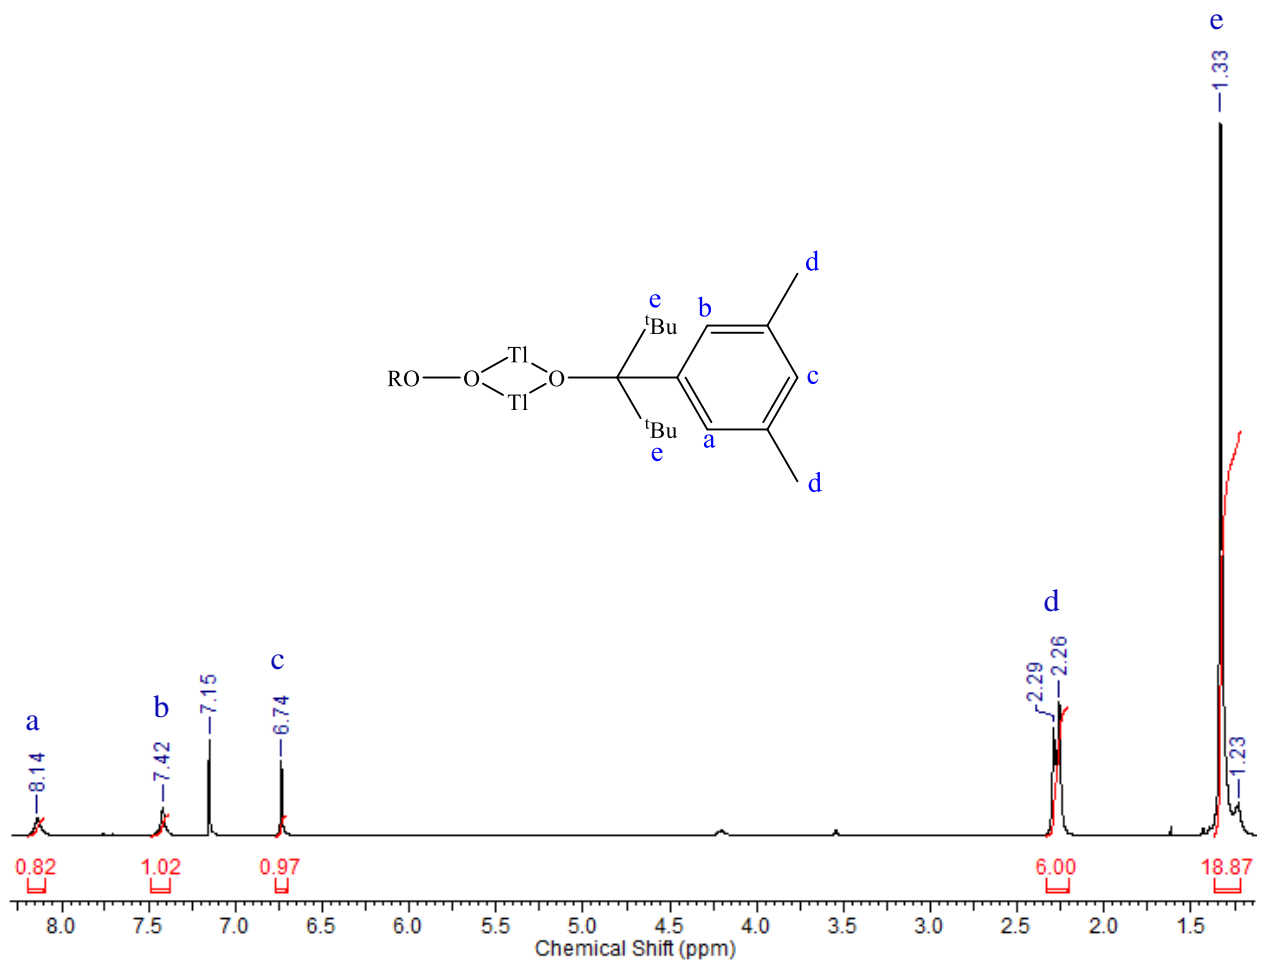

**Figure S24.** <sup>1</sup>H NMR of TiOC<sup>t</sup>Bu<sub>2</sub>(3,5-Me<sub>2</sub>C<sub>6</sub>H<sub>3</sub>) (C<sub>6</sub>D<sub>6</sub>, 600 MHz) (single isomer, obtained after prolonged storage at -35 °C).

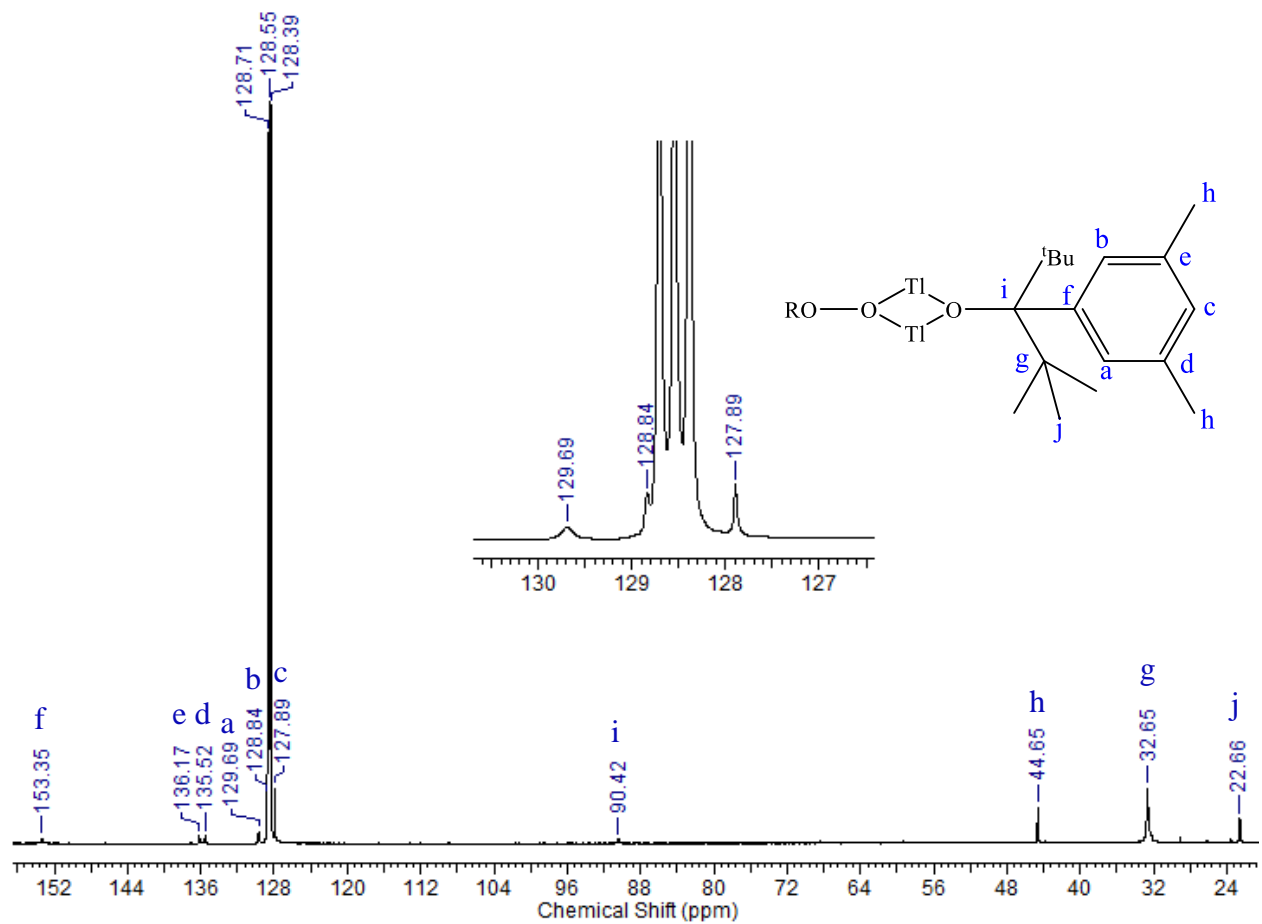

**Figure S25.**  $^{13}\text{C}$  NMR of  $\text{TiOC}^t\text{Bu}_2(3,5\text{-Me}_2\text{C}_6\text{H}_3)$  ( $\text{C}_6\text{D}_6$ , 150 MHz).

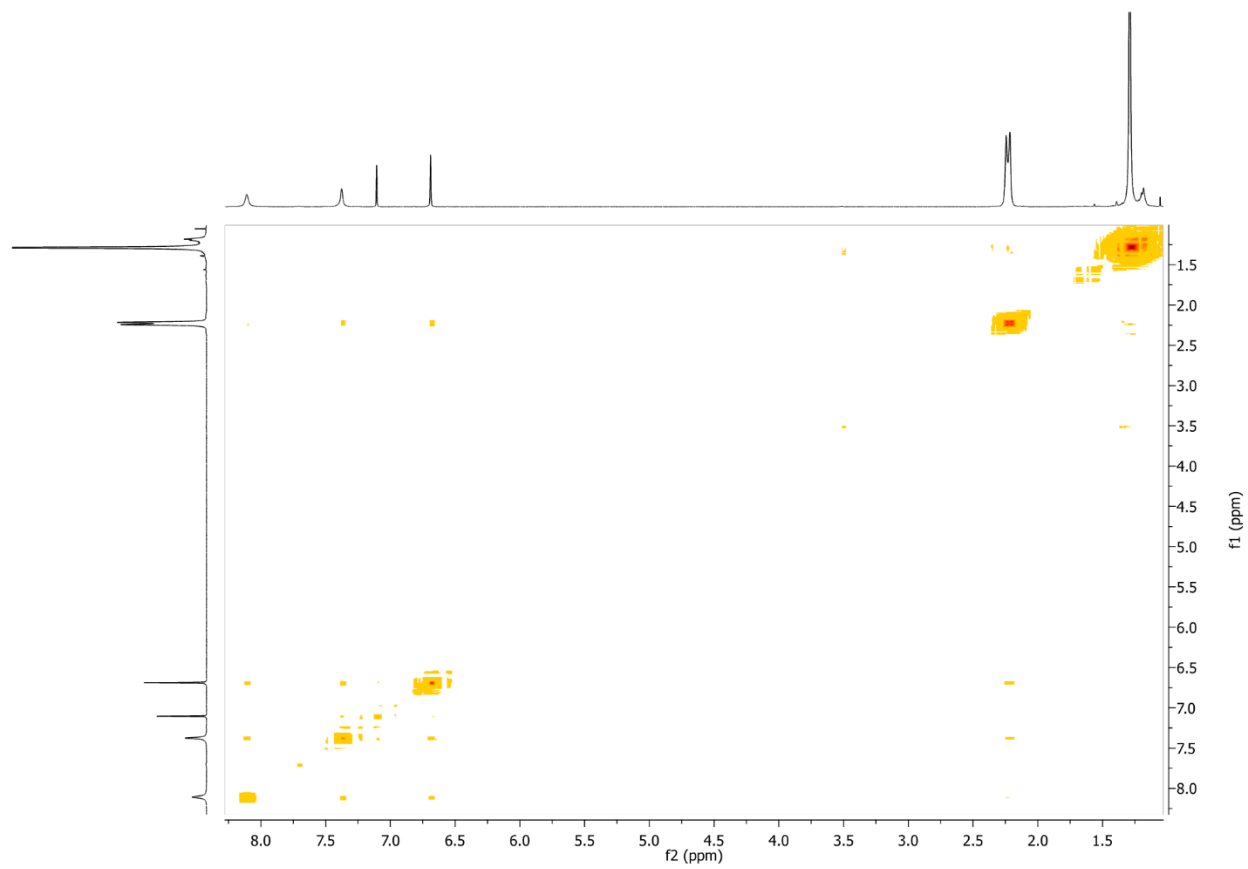

**Figure S26.**  $^1\text{H}$ - $^1\text{H}$  COSY NMR of  $\text{TiOC}^t\text{Bu}_2(3,5\text{-Me}_2\text{C}_6\text{H}_3)$  ( $\text{C}_6\text{D}_6$ , 600 MHz).

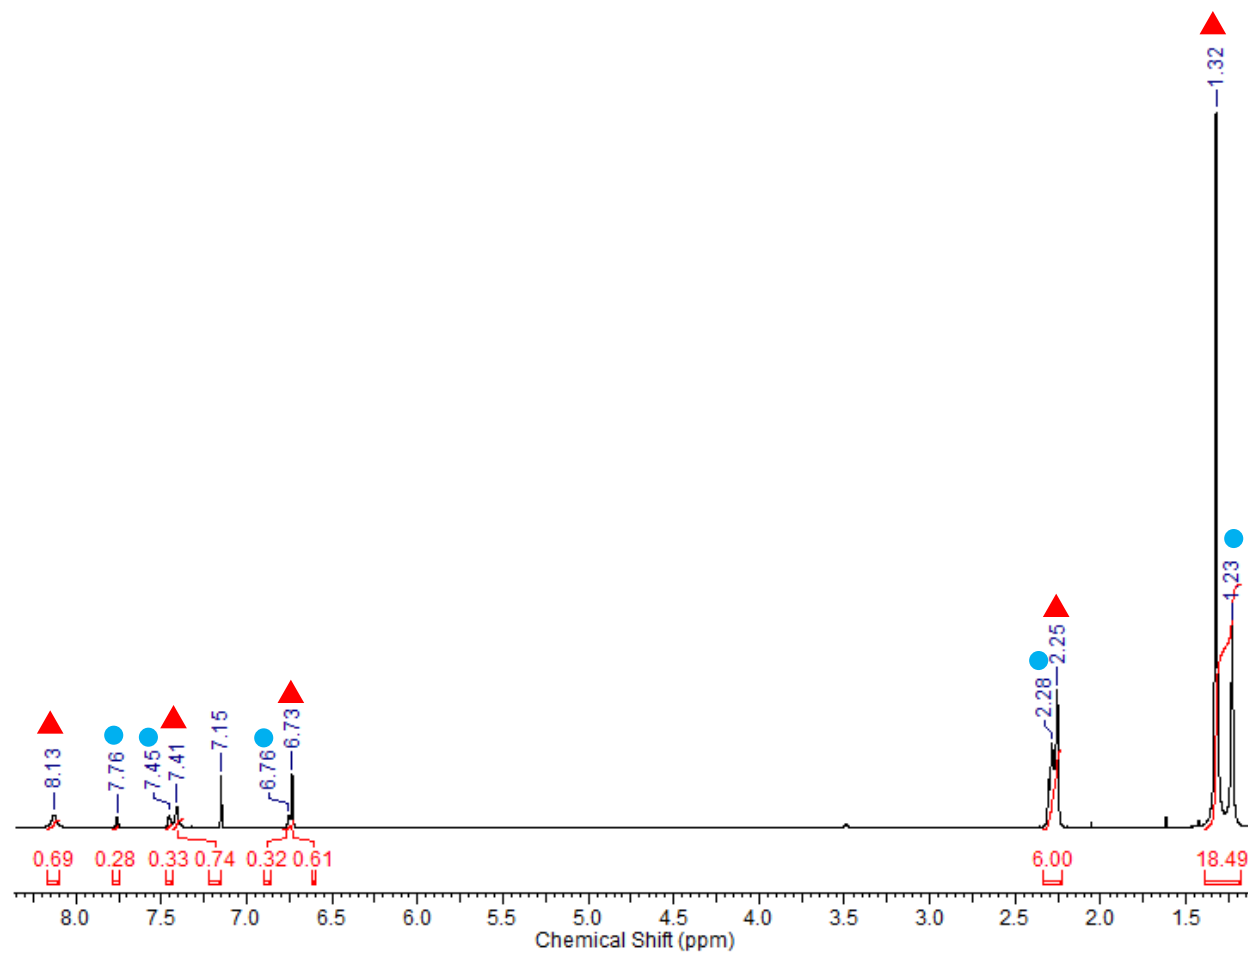

**Figure S27.**  $^1\text{H}$  NMR of freshly prepared  $\text{Tl}_2(\text{OC}^t\text{Bu}_2(3,5\text{-Me}_2\text{C}_6\text{H}_3))_2$  ( $\text{C}_6\text{D}_6$ , 600 MHz, room temperature) demonstrating two isomers.

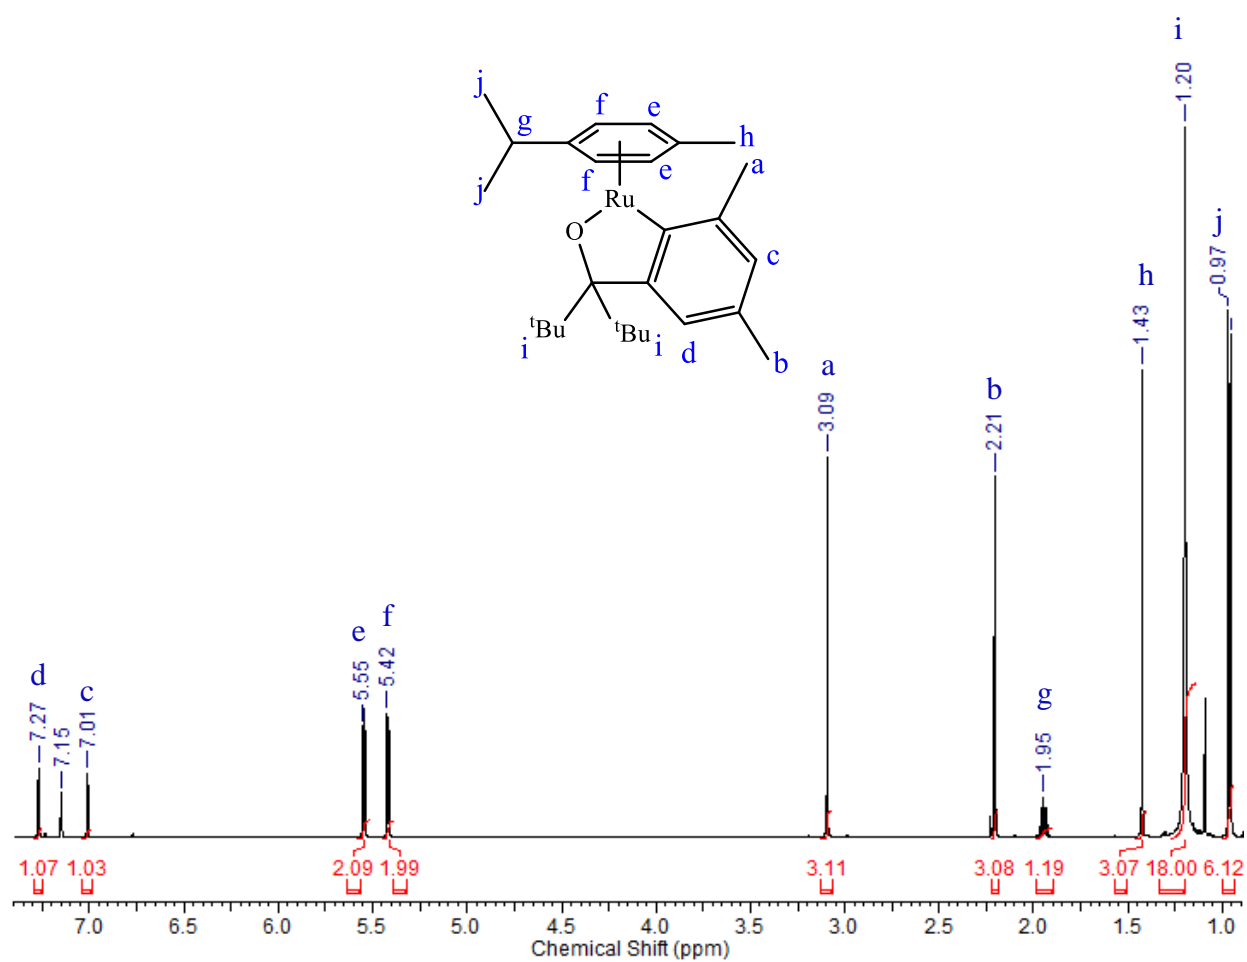

**Figure S28.** <sup>1</sup>H NMR of Ru(cymene)(κ<sup>2</sup>-OC<sup>t</sup>Bu<sub>2</sub>(3,5-Me<sub>2</sub>C<sub>6</sub>H<sub>3</sub>)) (C<sub>6</sub>D<sub>6</sub>, 600 MHz).

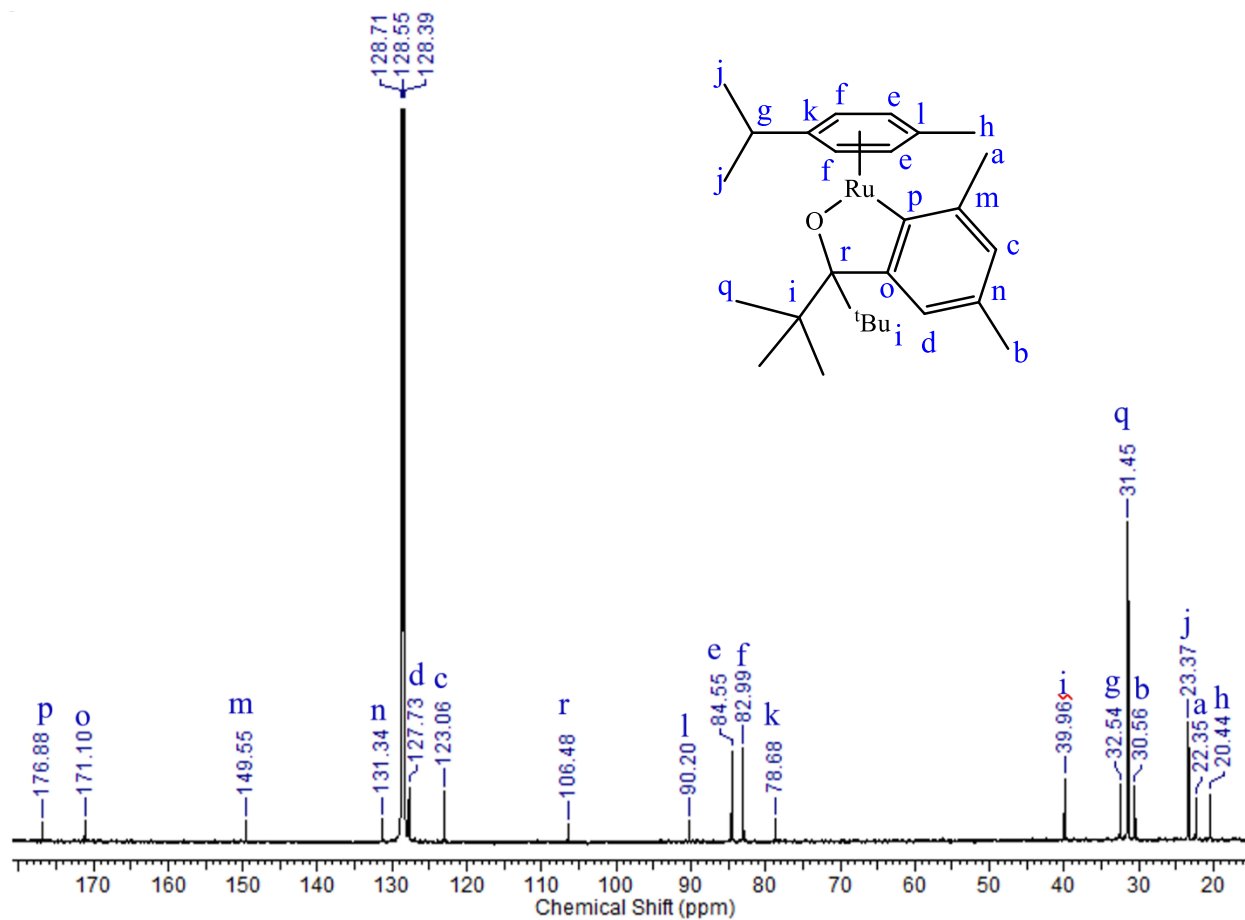

**Figure S29.**  $^{13}\text{C}$  NMR of  $\text{Ru}(\text{cymene})(\kappa^2\text{-OC}^t\text{Bu}_2(3,5\text{-Me}_2\text{C}_6\text{H}_3))$  ( $\text{C}_6\text{D}_6$ , 150 MHz).

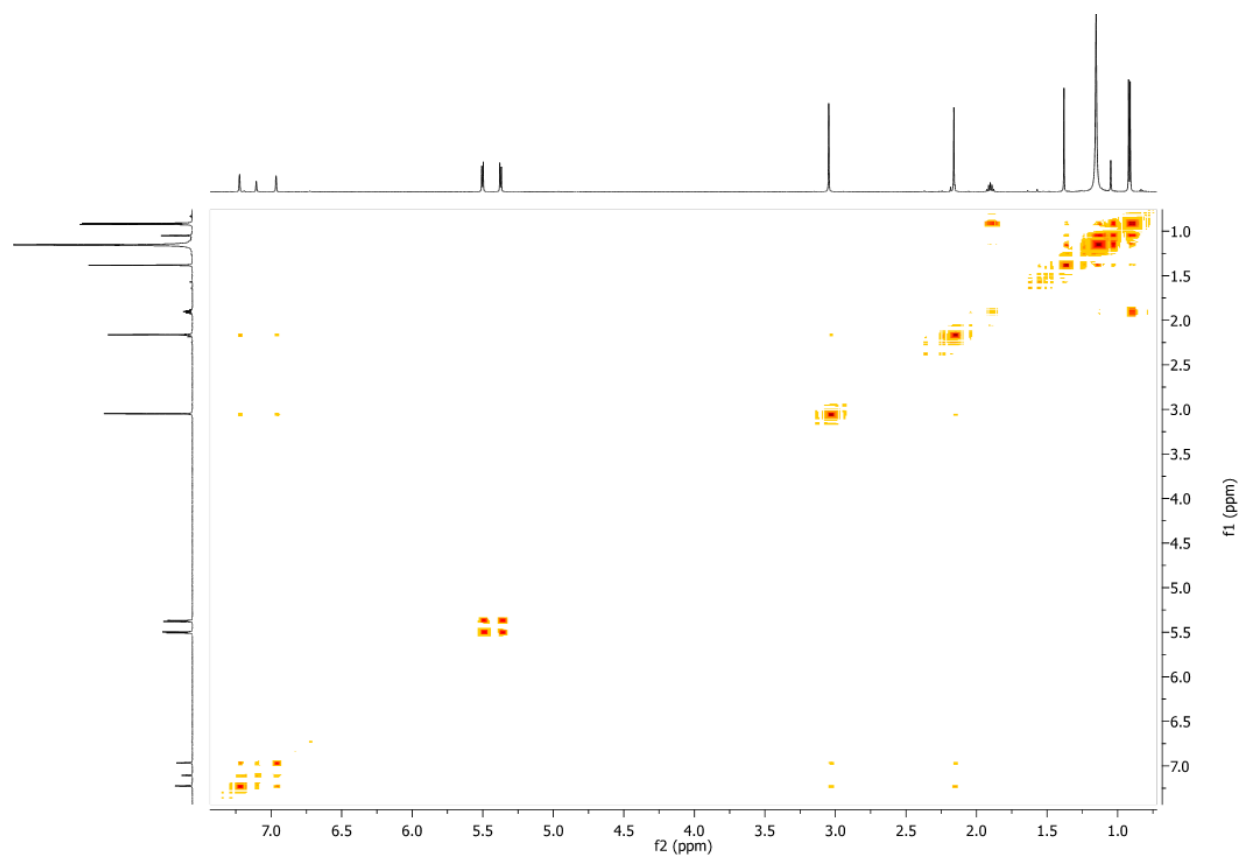

**Figure S30.**  $^1\text{H}$ - $^1\text{H}$  COSY NMR of  $\text{Ru}(\text{cymene})(\kappa^2\text{-OC}^t\text{Bu}_2(3,5\text{-Me}_2\text{C}_6\text{H}_3))$  ( $\text{C}_6\text{D}_6$ , 600 MHz).



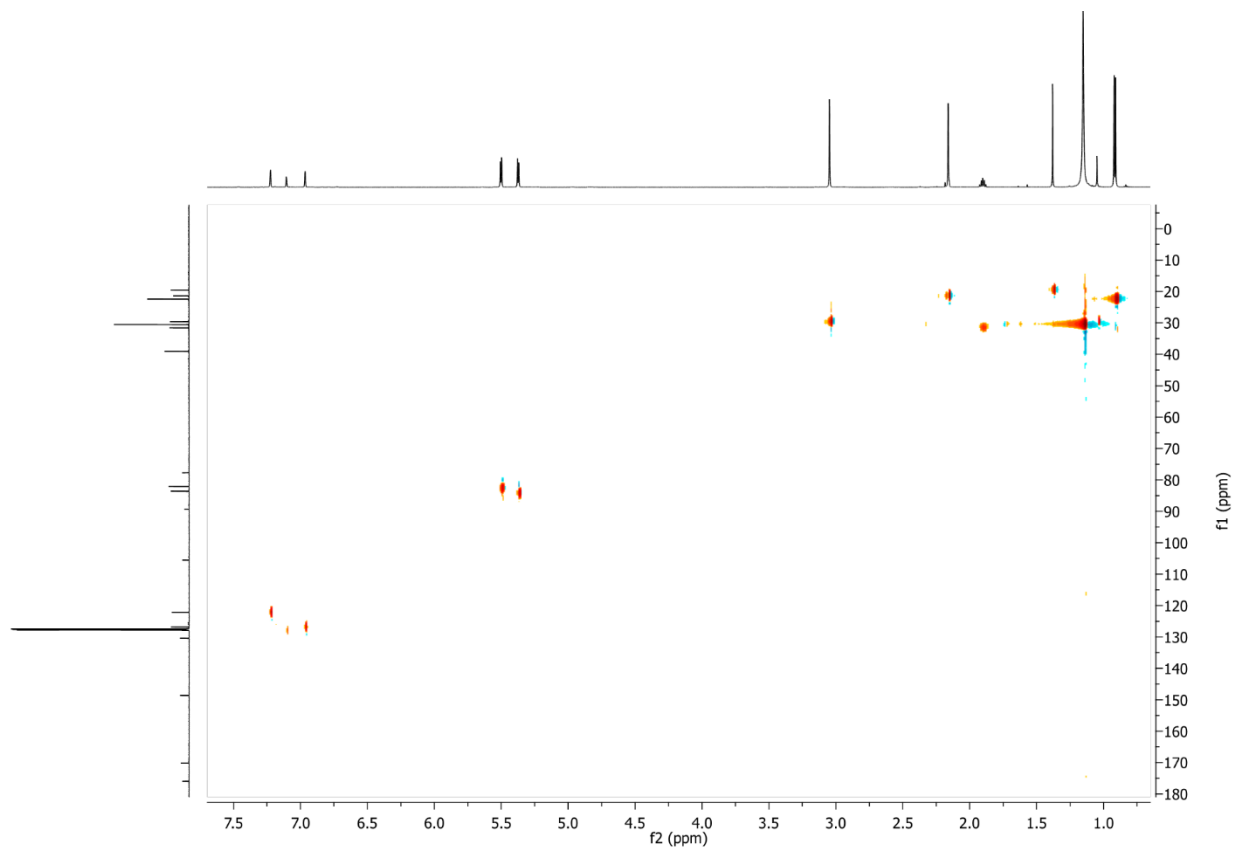

**Figure S31.**  $^1\text{H}$ - $^{13}\text{C}$  HSQCAD NMR of  $\text{Ru}(\text{cymene})(\kappa^2\text{-OC}^t\text{Bu}_2(3,5\text{-Me}_2\text{C}_6\text{H}_3))$  ( $\text{C}_6\text{D}_6$ , 600 MHz).

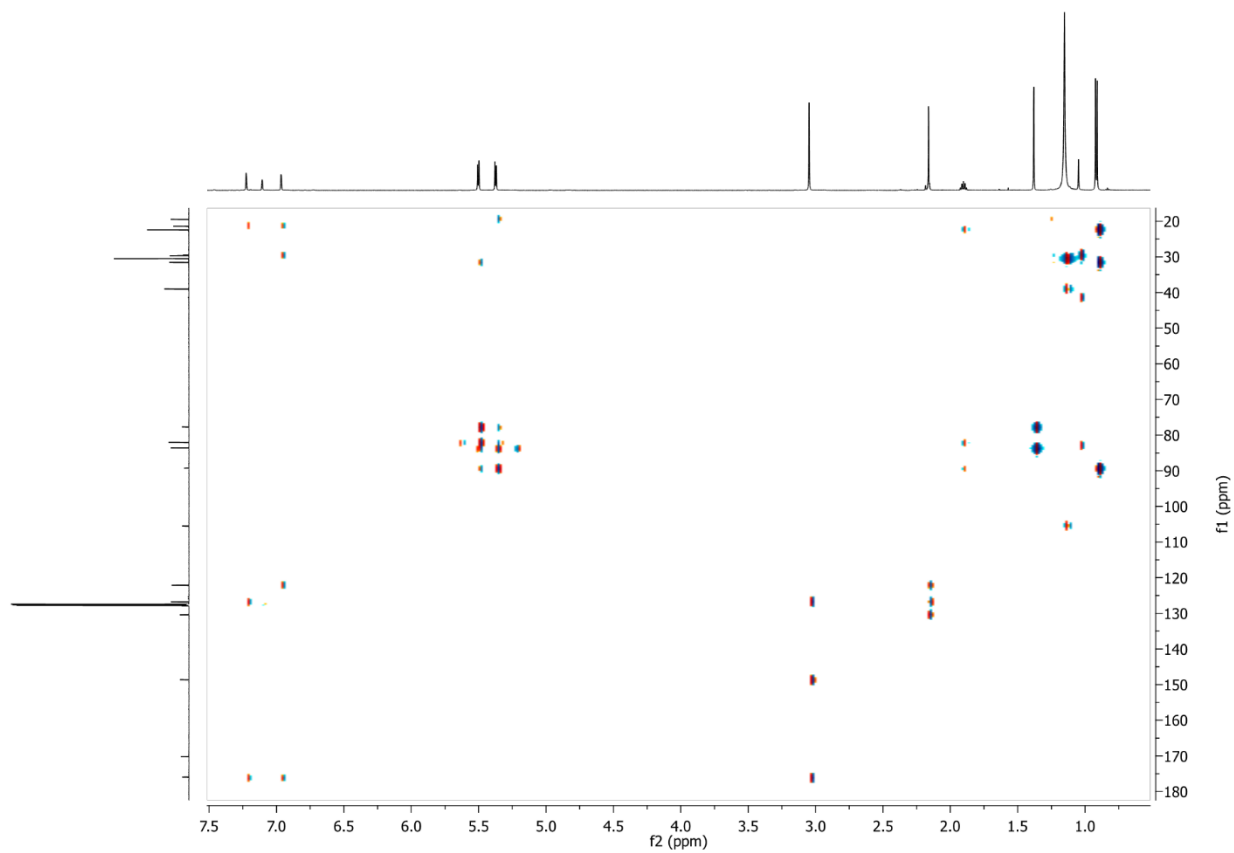

**Figure S32.**  $^1\text{H}$ - $^{13}\text{C}$  HMBCAD NMR of  $\text{Ru}(\text{cymene})(\kappa^2\text{-OC}^t\text{Bu}_2(3,5\text{-Me}_2\text{C}_6\text{H}_3))$  ( $\text{C}_6\text{D}_6$ , 600 MHz).

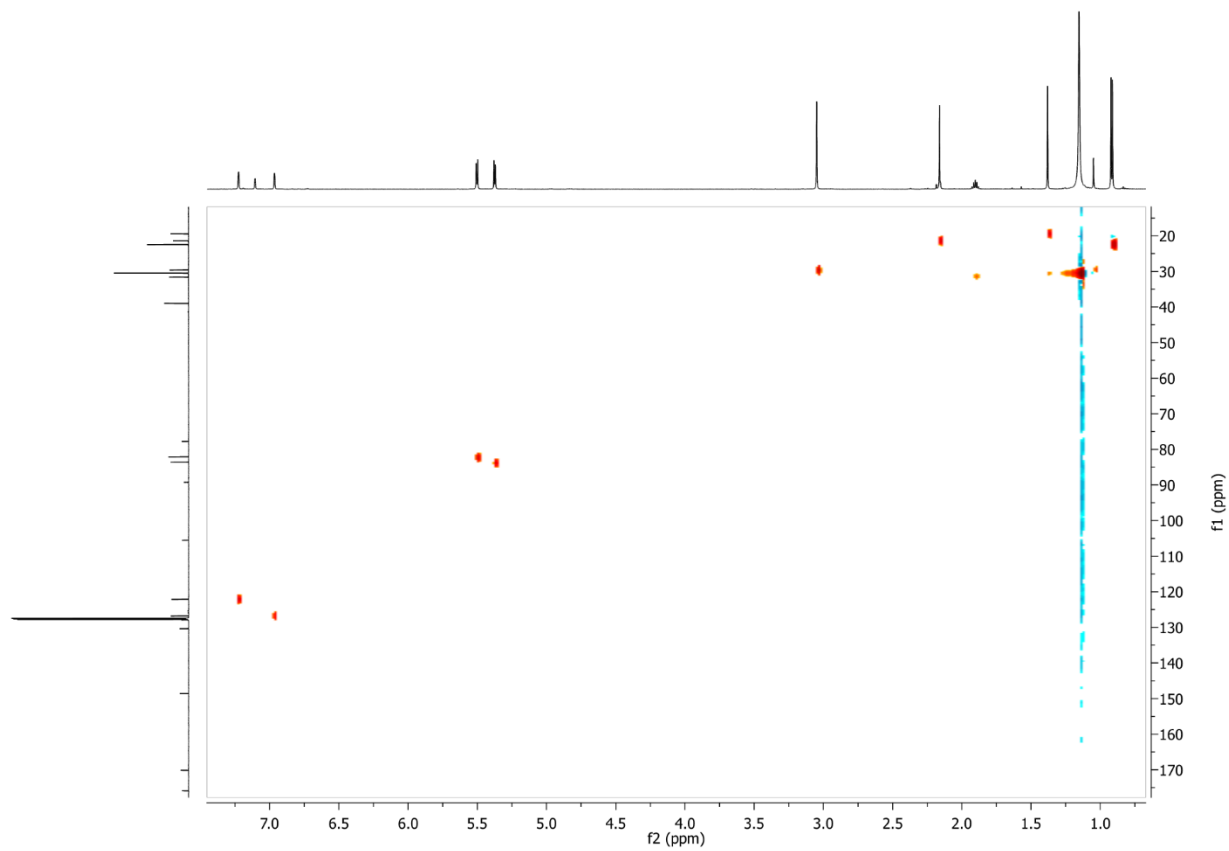

**Figure S33.**  $^1\text{H}$ - $^{13}\text{C}$  HMQC NMR of  $\text{Ru}(\text{cymene})(\kappa^2\text{-OC}^t\text{Bu}_2(3,5\text{-Me}_2\text{C}_6\text{H}_3))$  ( $\text{C}_6\text{D}_6$ , 600 MHz).

## 2. UV-Vis Spectra

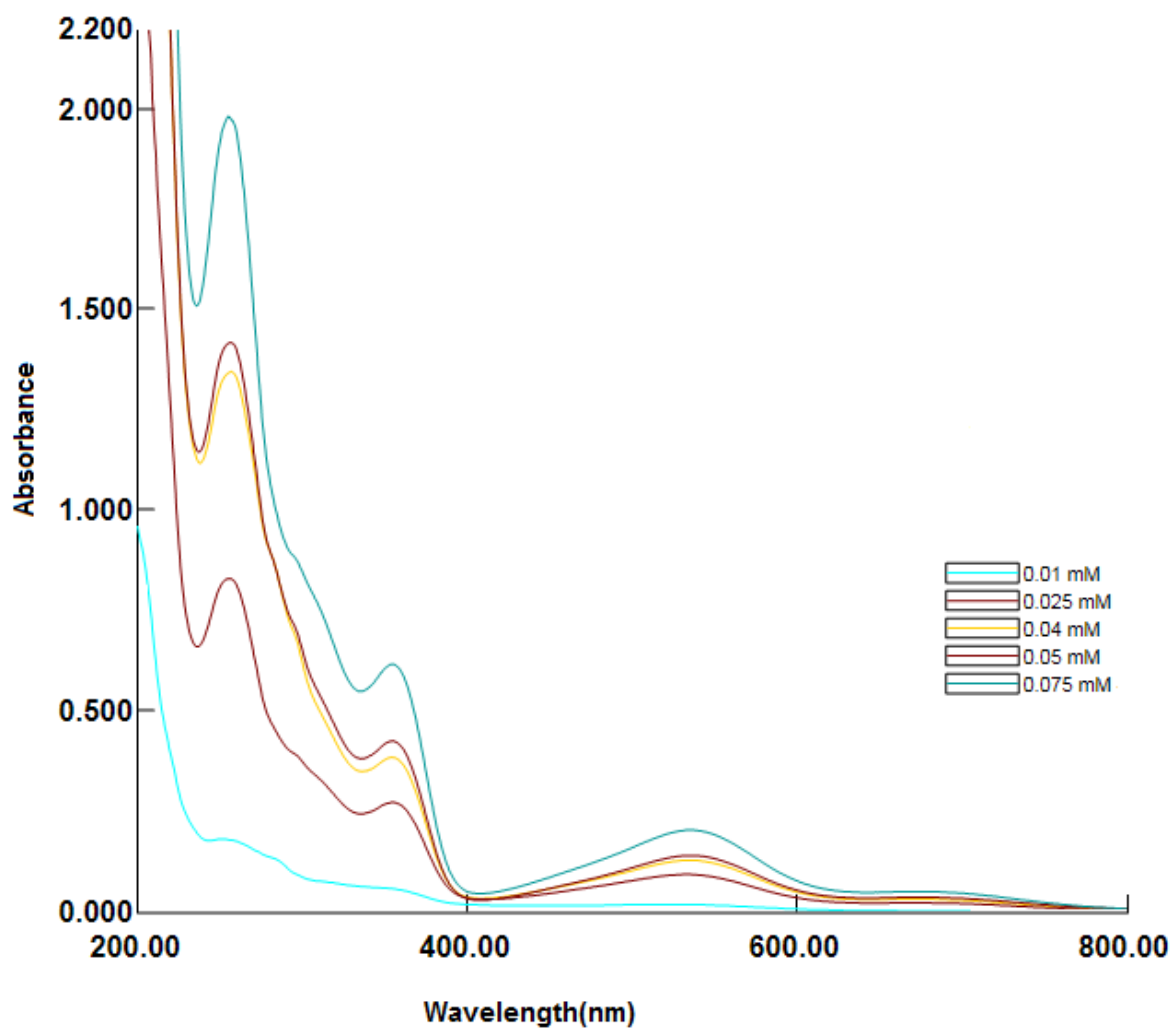

**Figure S34.** UV-Vis spectra for Ru(cymene)(κ²-OCᵗBu₂C₆H₂) at five different concentrations.  $\lambda_{\text{max}}$ , nm ( $\epsilon_{\text{M}}$ , L mol<sup>-1</sup> cm<sup>-1</sup>): 539 (2800), 355 (8600), 296 (sh, 13400), 256 (28300).

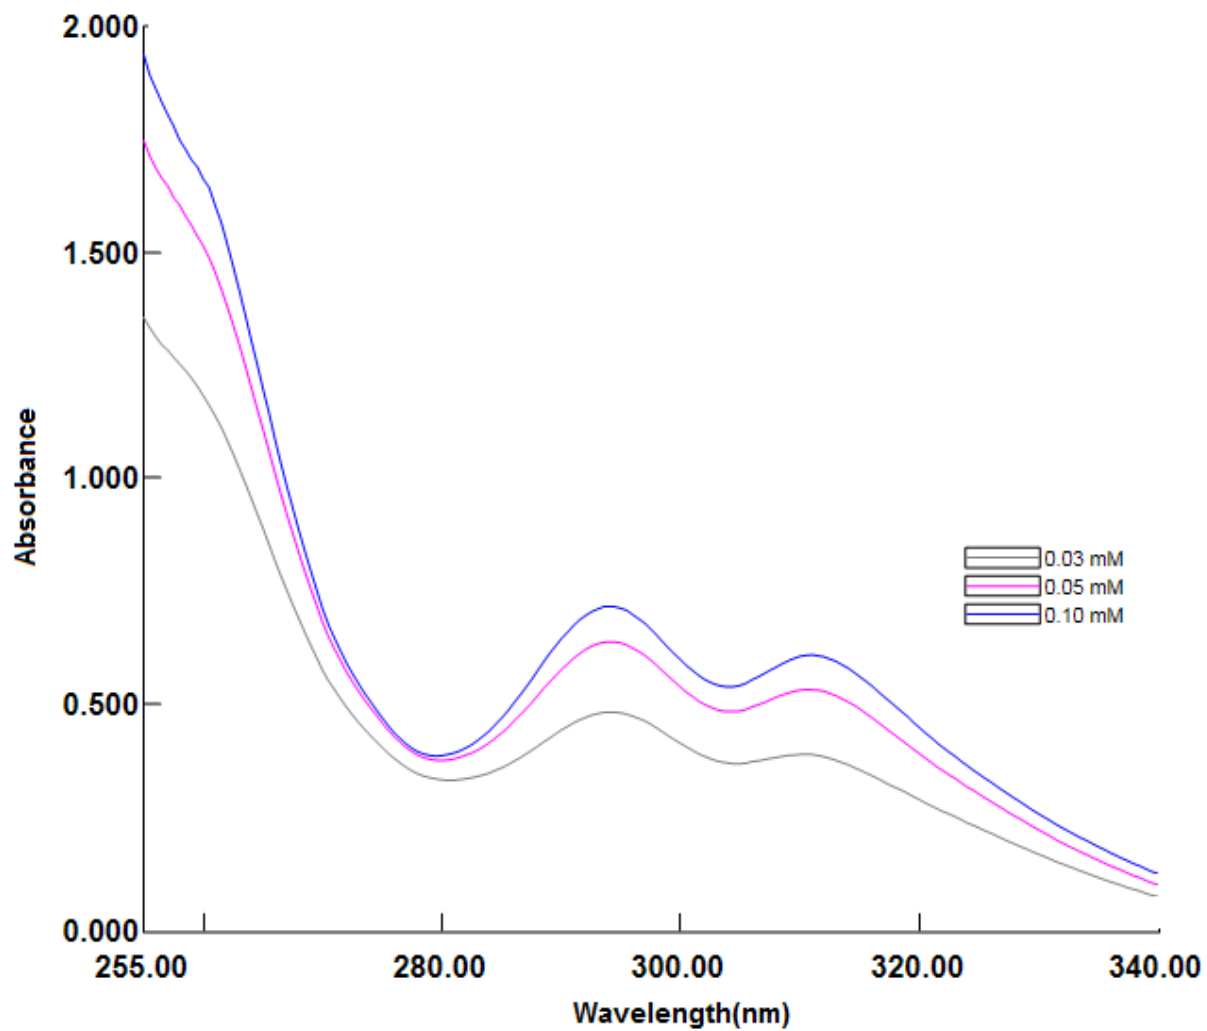

**Figure S35.** UV-Vis spectrum for  $\text{Ti}_2(\text{OC}^t\text{Bu}_2\text{Ph})_2$  at three different concentrations.  $\lambda_{\text{max}}$ , nm ( $\epsilon_M$ ,  $\text{L mol}^{-1} \text{cm}^{-1}$ ): 311 (3100), 294 (3300), 261(sh, 6500).

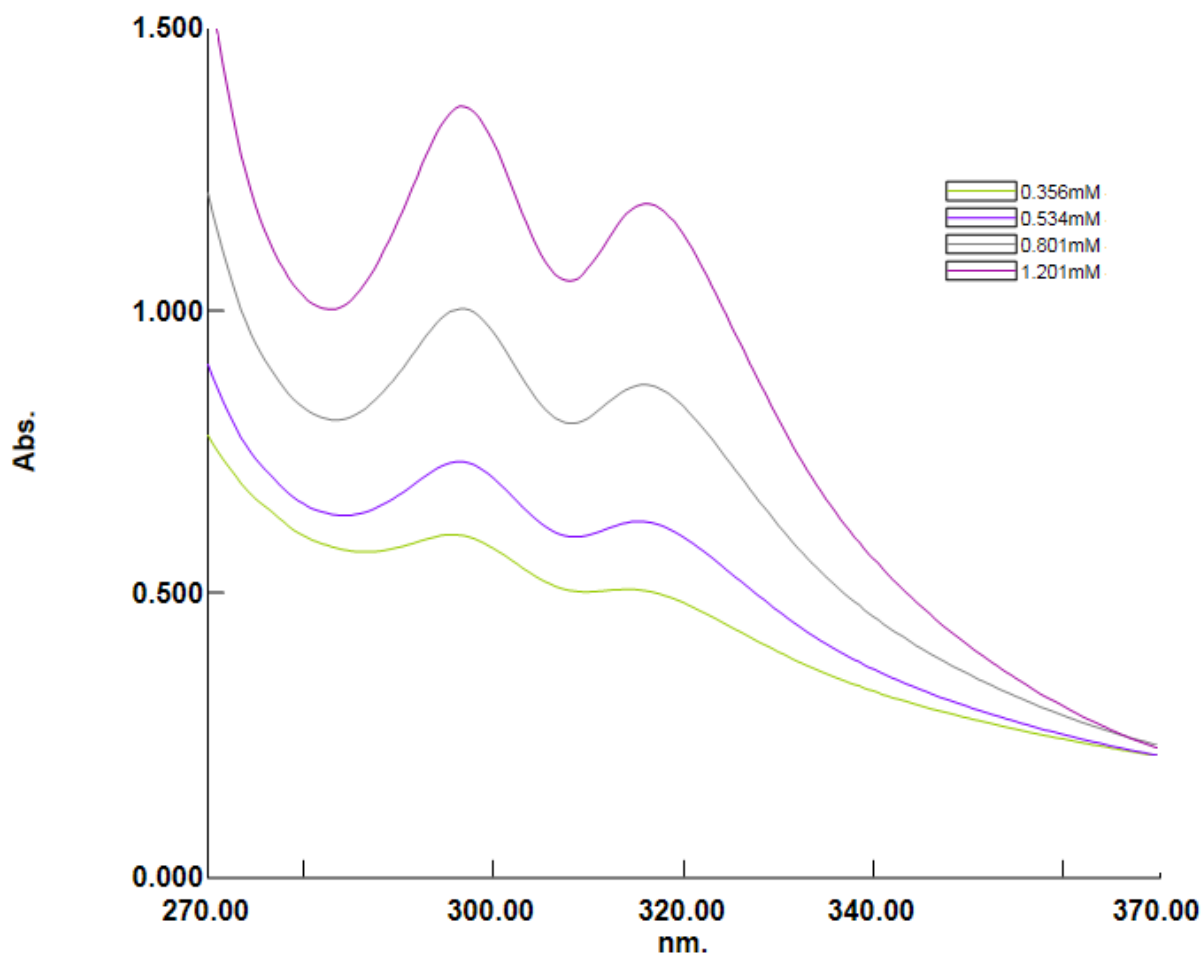

**Figure S36.** UV-Vis spectrum for  $\text{Ti}_2(\text{OC}^t\text{Bu}_2(3,5\text{-Me}_2\text{C}_6\text{H}_3))_2$  at four different concentrations.  $\lambda_{\text{max}}$ , nm ( $\epsilon_{\text{M}}$ ,  $\text{L mol}^{-1} \text{cm}^{-1}$ ): 316 (900), 297 (1200).

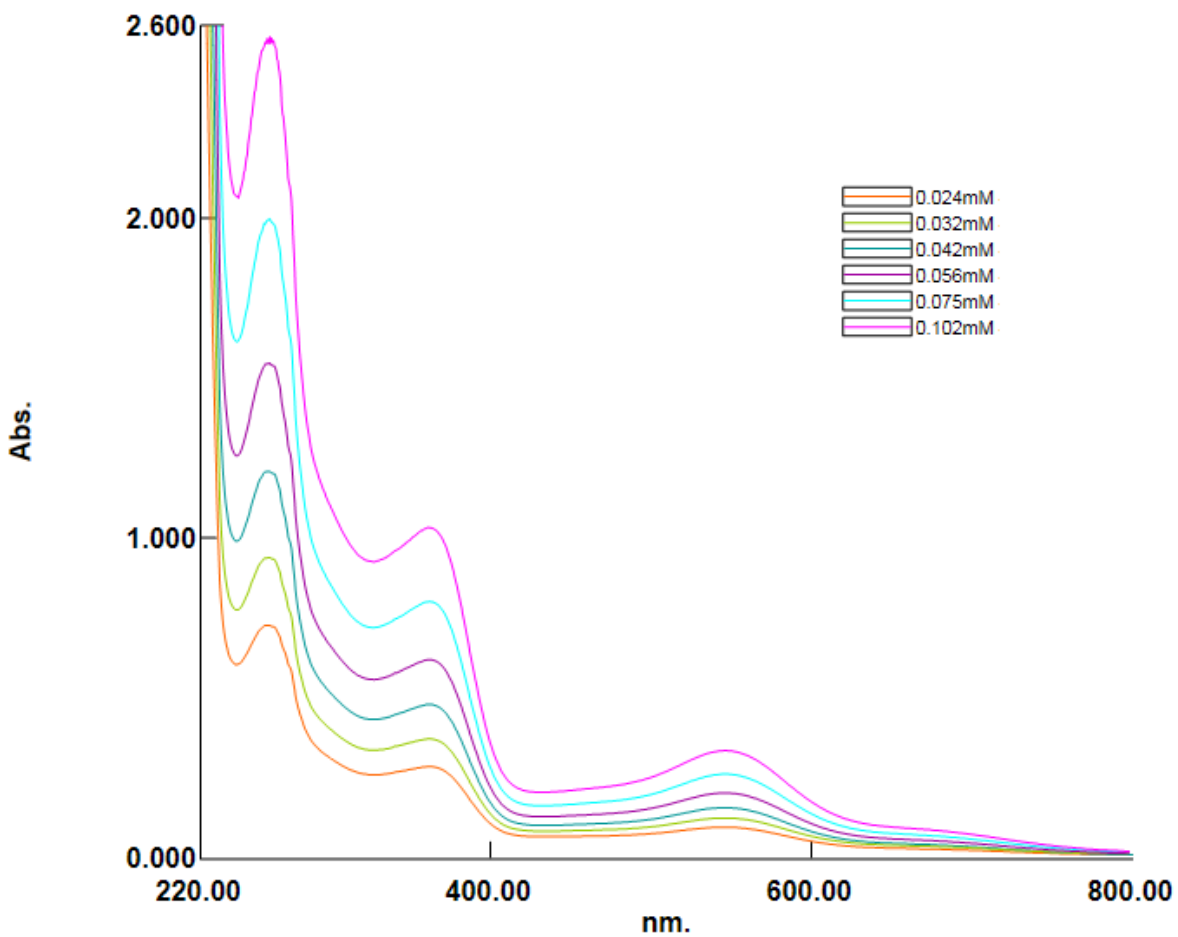

**Figure S37.** UV-Vis spectra for Ru(cymene)(κ<sup>2</sup>-OC<sup>t</sup>Bu<sub>2</sub>(3,5-Me<sub>2</sub>C<sub>6</sub>H<sub>3</sub>)) at six different concentrations. λ<sub>max</sub>, nm (ε<sub>M</sub>, L mol<sup>-1</sup> cm<sup>-1</sup>): 545 (5200), 361 (15400), 263 (30000).

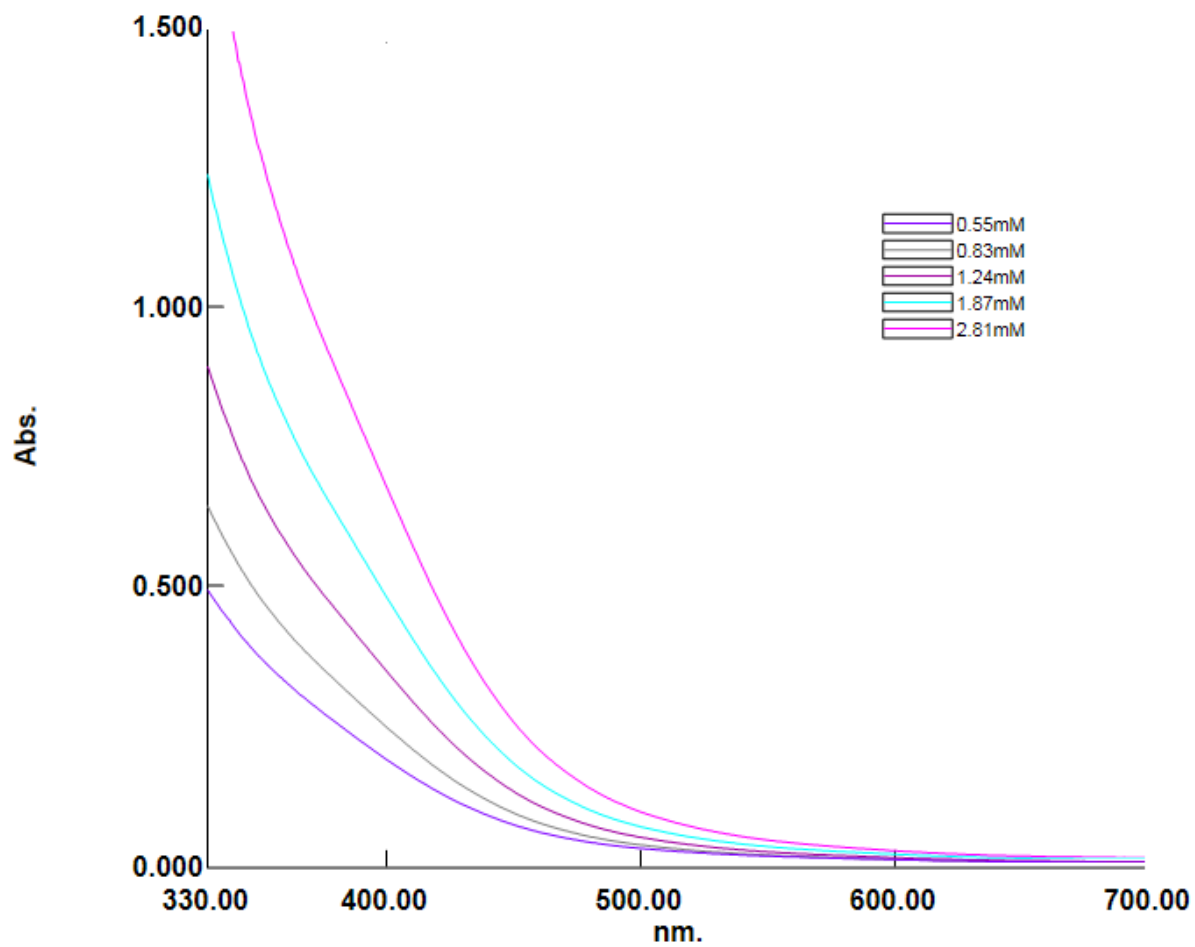

**Figure S38.** UV-Vis spectrum of Fe(OCtBu<sub>2</sub>(3,5-Me<sub>2</sub>C<sub>6</sub>H<sub>3</sub>))<sub>2</sub>(THF)<sub>2</sub> at five different concentrations.  $\lambda_{\text{max}}$ , nm ( $\epsilon_M$ , L mol<sup>-1</sup> cm<sup>-1</sup>): 407 (sh, 250).



### 3. IR Spectra

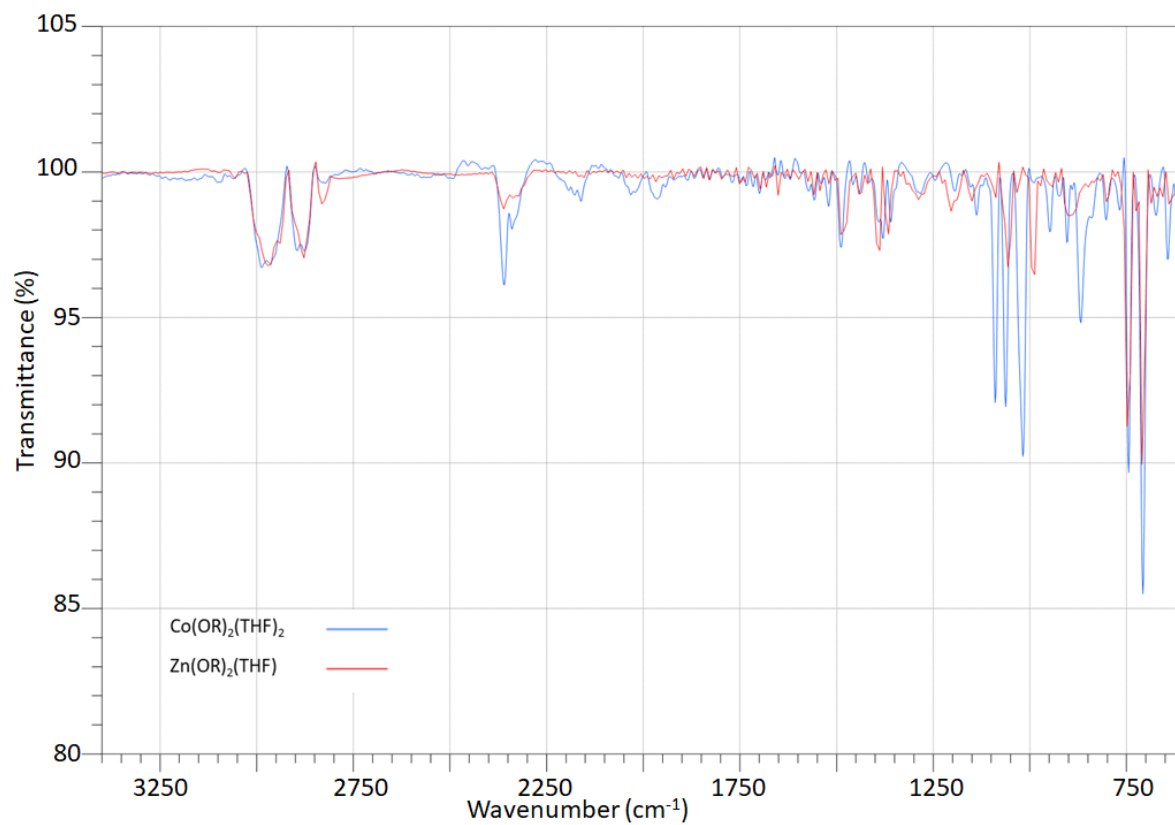

**Figure S39.** Overlaid IR spectra of  $\text{Co}(\text{OC}^t\text{Bu}_2\text{Ph})_2(\text{THF})_2$  and  $\text{Zn}(\text{OC}^t\text{Bu}_2\text{Ph})_2(\text{THF})$  in the 3400-600 cm<sup>-1</sup> range.

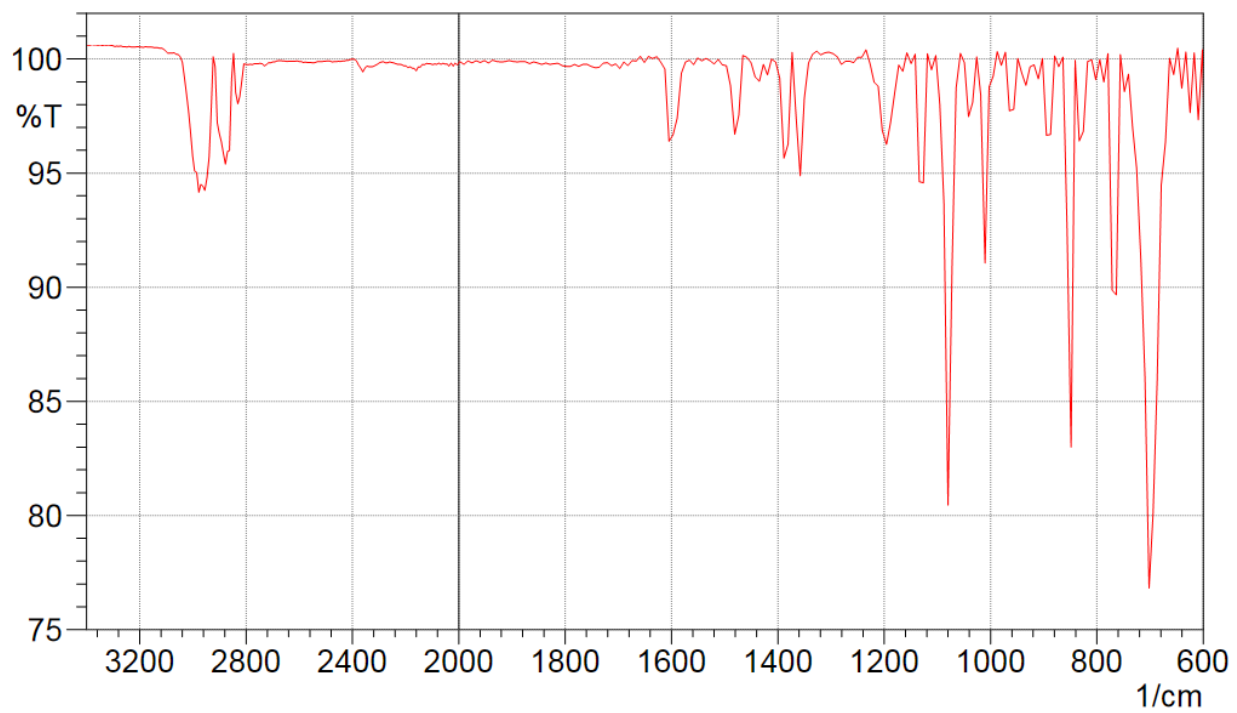

**Figure S40.** IR spectra of  $\text{LiOC}^t\text{Bu}_2(3,5\text{-Me}_2\text{C}_6\text{H}_3)$  in the  $3400\text{-}600\text{ cm}^{-1}$  range.

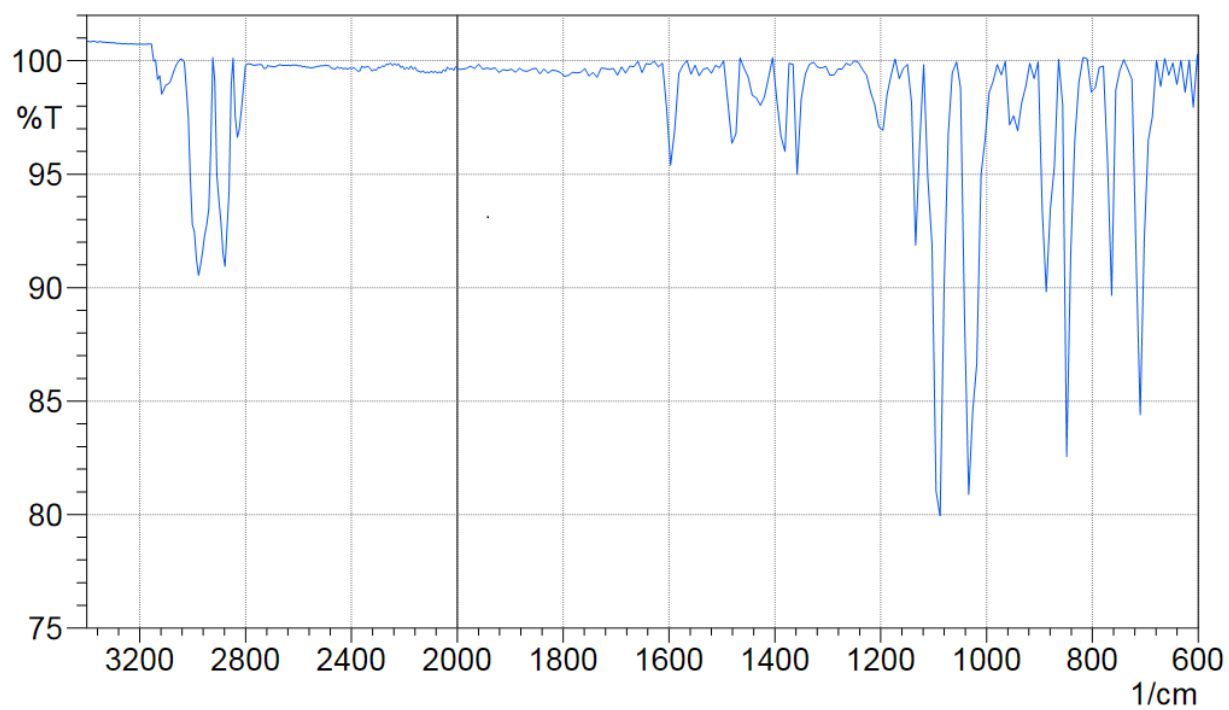

**Figure S41.** IR spectra of  $\text{Fe}(\text{OC}^t\text{Bu}_2(3,5\text{-Me}_2\text{C}_6\text{H}_3))_2(\text{THF})_2$  in the  $3400\text{-}600\text{ cm}^{-1}$  range.

#### 4. ORTEP plots of 1a and 1b demonstrating agostic interactions

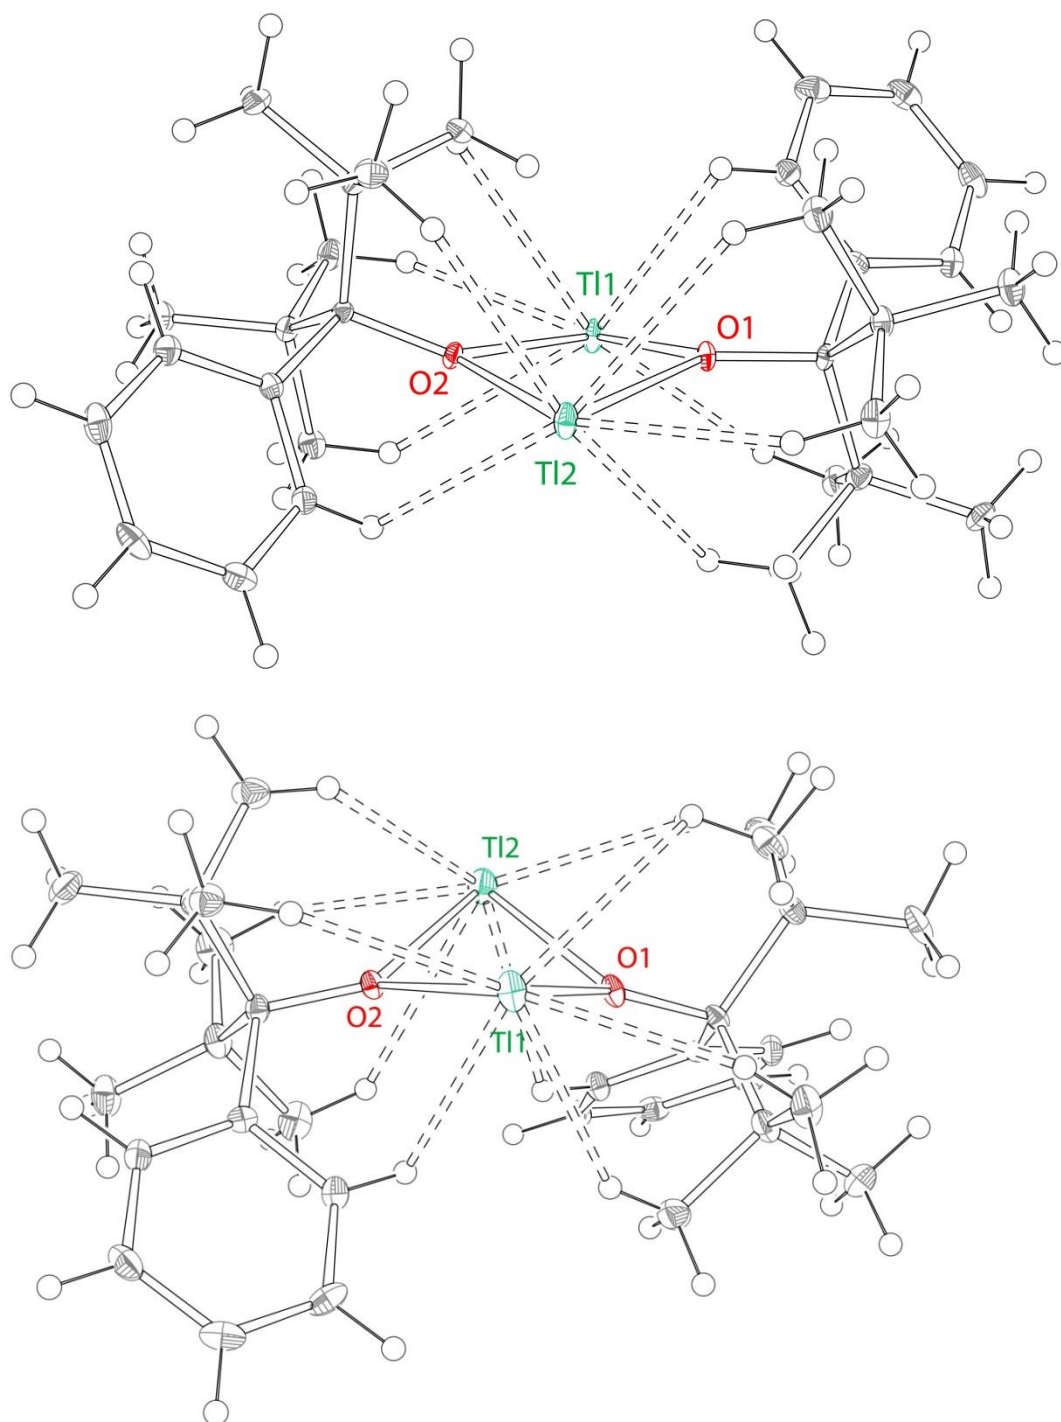

**Figure S42.** ORTEP diagram (50% probability ellipsoids) demonstrating agostic interactions for **1a** (top) and **1b** (bottom). Ti...H-C bond lengths are in 2.7-3.0 Å range.

**5. X-ray structure of  $\text{LiOC}^t\text{Bu}_2(3,5\text{-Me}_2\text{C}_6\text{H}_3)$  (**7**)**

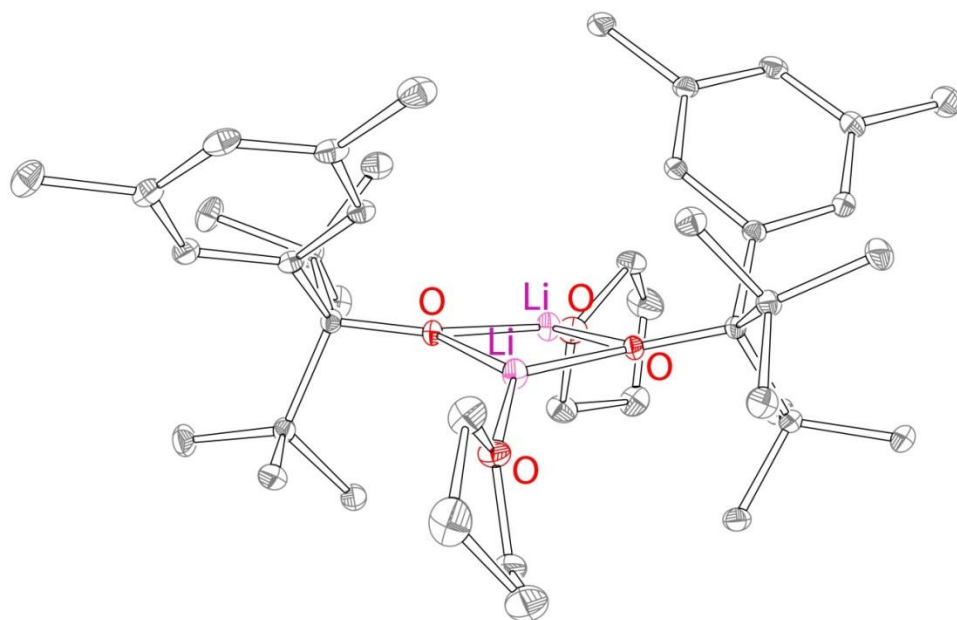

**Figure S43.** ORTEP diagram (50% probability ellipsoids) of the X-ray structure of **7**. H atoms were omitted for clarity.

**6. Table S1.** Crystal and structure refinement data.

|                                         | <b>1a</b>                                                      | <b>1b</b>                                                      | <b>5</b>                                          | <b>6</b>                            |
|-----------------------------------------|----------------------------------------------------------------|----------------------------------------------------------------|---------------------------------------------------|-------------------------------------|
| Formula                                 | C <sub>30</sub> H <sub>46</sub> O <sub>2</sub> Tl <sub>2</sub> | C <sub>30</sub> H <sub>46</sub> O <sub>2</sub> Tl <sub>2</sub> | C <sub>34</sub> H <sub>54</sub> O <sub>3</sub> Zn | C <sub>25</sub> H <sub>36</sub> ORu |
| Fw, g/mol                               | 847.41                                                         | 847.41                                                         | 576.14                                            | 453.61                              |
| temperature                             | 100(2) K                                                       | 100(2) K                                                       | 100(2) K                                          | 100(2) K                            |
| cryst syst                              | Triclinic                                                      | triclinic                                                      | monoclinic                                        | triclinic                           |
| space group                             | <i>P</i> -1                                                    | <i>P</i> -1                                                    | <i>P</i> 2 <sub>1</sub> / <i>n</i>                | <i>P</i> -1                         |
| Colour                                  | colorless                                                      | bright yellow                                                  | colorless                                         | purple                              |
| Z                                       | 2                                                              | 2                                                              | 2                                                 | 2                                   |
| a, Å                                    | 7.9029(9)                                                      | 8.0763(5)                                                      | 10.0341(11)                                       | 9.3633(8)                           |
| b, Å                                    | 12.1061(14)                                                    | 12.3094(7)                                                     | 23.577(3)                                         | 11.1104(9)                          |
| c, Å                                    | 15.5684(18)                                                    | 15.4883(9)                                                     | 13.7200(17)                                       | 11.4477(9)                          |
| α, deg                                  | 88.456(4)                                                      | 101.592(2)                                                     | 90.00                                             | 91.329(4)                           |
| β, deg                                  | 80.664(4)                                                      | 94.016(3)                                                      | 106.953(4)                                        | 102.082(4)                          |
| γ, deg                                  | 74.856(4)                                                      | 105.845(2)                                                     | 90.00                                             | 112.349(4)                          |
| V, Å <sup>3</sup>                       | 1418.5(3)                                                      | 1438.24(15)                                                    | 3104.8(6)                                         | 1070.07(15)                         |
| d <sub>calcd</sub> , g/cm <sup>3</sup>  | 1.984                                                          | 1.957                                                          | 1.233                                             | 1.408                               |
| μ, mm <sup>-1</sup>                     | 11.369                                                         | 11.214                                                         | 0.822                                             | 0.744                               |
| 2θ, deg                                 | 55.98                                                          | 50.00                                                          | 60.06                                             | 56.74                               |
| R <sub>1</sub> <sup>a</sup> (all data)  | 0.0224                                                         | 0.0315                                                         | 0.1088                                            | 0.0354                              |
| wR <sub>2</sub> <sup>b</sup> (all data) | 0.0392                                                         | 0.0675                                                         | 0.1009                                            | 0.0697                              |
| R <sub>1</sub> <sup>a</sup> [(I>2σ)]    | 0.0176                                                         | 0.0262                                                         | 0.0477                                            | 0.0319                              |
| wR <sub>2</sub> <sup>b</sup> [(I>2σ)]   | 0.0376                                                         | 0.0651                                                         | 0.0835                                            | 0.0682                              |
| GOF (F <sup>2</sup> )                   | 1.024                                                          | 1.151                                                          | 1.000                                             | 1.108                               |

<sup>a</sup>  $R_1 = \sum ||F_o - |F_c|| / \sum |F_o|$ . <sup>b</sup>  $wR_2 = (\sum (w(F_o^2 - F_c^2)^2) / \sum (w(F_o^2)^2))^{1/2}$ . <sup>c</sup>  $GOF = (\sum w(F_o^2 - F_c^2)^2 / (n - p))^{1/2}$  where  $n$  is the number of data and  $p$  is the number of parameters refined.

**Table S1.** Crystal and structure refinement data (continued).

|                                         | <b>7</b>                                                       | <b>8</b>                                                       | <b>9</b>                                          | <b>10</b>                           |
|-----------------------------------------|----------------------------------------------------------------|----------------------------------------------------------------|---------------------------------------------------|-------------------------------------|
| Formula                                 | C <sub>42</sub> H <sub>70</sub> O <sub>4</sub> Li <sub>2</sub> | C <sub>34</sub> H <sub>54</sub> O <sub>2</sub> Tl <sub>2</sub> | C <sub>42</sub> H <sub>70</sub> O <sub>4</sub> Fe | C <sub>27</sub> H <sub>40</sub> ORu |
| Fw, g/mol                               | 652.86                                                         | 903.51                                                         | 694.83                                            | 481.66                              |
| temperature                             | 100(2) K                                                       | 100(2) K                                                       | 100(2) K                                          | 100(2) K                            |
| cryst syst                              | monoclinic                                                     | monoclinic                                                     | monoclinic                                        | triclinic                           |
| space group                             | <i>P2<sub>1</sub>/c</i>                                        | <i>P2<sub>1</sub></i>                                          | <i>P2<sub>1</sub>/n</i>                           | <i>P-1</i>                          |
| Colour                                  | colorless                                                      | colorless                                                      | colorless                                         | violet                              |
| Z                                       | 4                                                              | 2                                                              | 4                                                 | 2                                   |
| a, Å                                    | 11.9523(13)                                                    | 8.0476(3)                                                      | 10.4095(5)                                        | 8.1664(4)                           |
| b, Å                                    | 21.215(3)                                                      | 15.1435(6)                                                     | 14.9890(7)                                        | 10.4284(5)                          |
| c, Å                                    | 15.9314(18)                                                    | 13.6841(5)                                                     | 25.9262(11)                                       | 14.7777(7)                          |
| α, deg                                  | 90.00                                                          | 90.00                                                          | 90.00                                             | 106.093(2)                          |
| β, deg                                  | 93.335(5)                                                      | 98.9240(10)                                                    | 96.890(2)                                         | 98.321(2)                           |
| γ, deg                                  | 90.00                                                          | 90.00                                                          | 90.00                                             | 93.777(2)                           |
| V, Å <sup>3</sup>                       | 4032.9(9)                                                      | 1647.48(11)                                                    | 4016.0(3)                                         | 1189.00(10)                         |
| d <sub>calcd</sub> , g/cm <sup>3</sup>  | 1.075                                                          | 1.821                                                          | 1.149                                             | 1.452                               |
| μ, mm <sup>-1</sup>                     | 0.066                                                          | 9.796                                                          | 0.413                                             | 0.674                               |
| 2θ, deg                                 | 55.84                                                          | 55.14                                                          | 49.70                                             | 61.18                               |
| R <sub>1</sub> <sup>a</sup> (all data)  | 0.0589                                                         | 0.0312                                                         | 0.1070                                            | 0.0367                              |
| wR <sub>2</sub> <sup>b</sup> (all data) | 0.1126                                                         | 0.0519                                                         | 0.1063                                            | 0.0762                              |
| R <sub>1</sub> <sup>a</sup> [(I>2σ)]    | 0.0422                                                         | 0.0264                                                         | 0.0516                                            | 0.0303                              |
| wR <sub>2</sub> <sup>b</sup> [(I>2σ)]   | 0.1027                                                         | 0.0503                                                         | 0.0910                                            | 0.0734                              |
| GOF (F <sup>2</sup> )                   | 1.034                                                          | 1.033                                                          | 1.005                                             | 1.090                               |

<sup>a</sup>  $R_1 = \sum ||F_o - |F_c|| / \sum |F_o|$ . <sup>b</sup>  $wR_2 = (\sum (w(F_o^2 - F_c^2)^2) / \sum (w(F_o^2)^2))^{1/2}$ . <sup>c</sup>  $GOF = (\sum w(F_o^2 - F_c^2)^2 / (n - p))^{1/2}$  where  $n$  is the number of data and  $p$  is the number of parameters refined.
